1       **Adverse Long-Term Outcomes and an Immune Suppressed Endotype in**  
2       **Sepsis Patients with Reduced Interferon- $\gamma$  ELISpot: A Multicenter,**  
3       **Prospective Observational Study**  
4

5       Evan A. Barrios<sup>1</sup>, Monty B. Mazer<sup>5</sup>, Patrick McGonagill<sup>6</sup> Christian B. Bergmann<sup>3,\*</sup>, Michael D.  
6       Goodman<sup>3</sup>, Robert W. Gould<sup>11</sup>, Mahil Rao<sup>10</sup>, Valerie Polcz<sup>1</sup>, Ruth Davis<sup>1</sup>, Drew Del Toro<sup>4</sup>,  
7       Marvin Dirain<sup>1</sup>, Alexandra Dram<sup>4</sup>, Lucas Hale<sup>11</sup>, Mohammad Heidarian<sup>12</sup>, Tamara A. Kucaba<sup>12</sup>,  
8       Jennifer P. Lanz<sup>1</sup>, Ashley McCray<sup>1</sup>, Sandra Meszaros<sup>4</sup>, Sydney Miles<sup>4</sup>, Candace Nelson<sup>11</sup>,  
9       Ivanna Rocha<sup>1</sup>, Elvia E Silva<sup>7</sup>, Ricardo Ungaro<sup>1</sup>, Andrew Walton<sup>4</sup>, Julie Xu<sup>12</sup>, Leilani Zeumer-  
10       Spataro<sup>1</sup>, Anne M. Drewry<sup>4</sup> Muxuan Liang<sup>2</sup>, Letitia E. Bible<sup>1</sup>, Tyler Loftus<sup>1</sup>, Isaiah Turnbull<sup>4</sup>,  
11       Philip A. Efron<sup>1</sup>, Kenneth E. Remy<sup>5</sup>, Scott Brakenridge<sup>15</sup>, Vladimir P. Badovinac<sup>7,8,9</sup>, Thomas  
12       S. Griffith<sup>12,13,14</sup>, Lyle L. Moldawer<sup>1,16</sup>, Richard S. Hotchkiss<sup>4</sup>, Charles C. Caldwell<sup>3</sup>

13  
14       <sup>1</sup>Sepsis and Critical Illness Research Center, Department of Surgery, University of Florida  
15       College of Medicine, Gainesville, Florida 32610 USA

16  
17       <sup>2</sup>Department of Biostatistics, University of Florida College of Medicine, Gainesville, Florida  
18       32610 USA

19  
20       <sup>3</sup>Department of Surgery, University of Cincinnati College of Medicine, Cincinnati, Ohio 45267,  
21       USA.

22  
23       <sup>4</sup>Department of Anesthesiology, Washington University School of Medicine, St. Louis, Missouri  
24       63110 USA

25  
26       <sup>5</sup>Department of Pediatrics, Case Western Reserve University School of Medicine, Cleveland,  
27       Ohio 44106USA

28  
29       <sup>6</sup>Department of Surgery, University of Iowa Carver College of Medicine, Iowa City, Iowa 52242  
30       USA.

31  
32       <sup>7</sup>Department of Pathology, University of Iowa Carver College of Medicine, Iowa City, Iowa  
33       52242 USA.

34  
35       <sup>8</sup>Interdisciplinary Program in Immunology, University of Iowa Carver College of Medicine, Iowa  
36       City, Iowa 52242 USA.

37  
38       <sup>9</sup>Experimental Pathology Ph.D. Program, University of Iowa Carver College of Medicine, Iowa  
39       City, Iowa 52242 USA.

40  
41       <sup>10</sup>Department of Pediatrics, University of Iowa Carver College of Medicine, Iowa City, Iowa  
42       52242 USA.

43  
44       <sup>11</sup>Department of Anesthesiology, University of Minnesota Medical School, Minneapolis,  
45       Minnesota 55455 USA.

46  
47 <sup>12</sup>Department of Urology, University of Minnesota Medical School, Minneapolis, Minnesota  
48 55455, USA.

49  
50 <sup>13</sup>Center for Immunology, University of Minnesota Medical School, Minneapolis, Minnesota  
51 55455 USA.

52  
53 <sup>14</sup>Minneapolis VA Healthcare System, Minneapolis, Minnesota 55417, USA

54  
55 <sup>15</sup>Department of Surgery, Harborview Medical Center, University of Washington School of  
56 Medicine, Seattle, Washington 98133 USA

57  
58 \* *current address: Department of Anesthesiology and Critical Care Medicine, University of Ulm,*  
59 *Ulm Germany.*

60  
61 Running head: ELISpot Use in Critical Illness

62  
63 Key words: critical illness, late mortality, procalcitonin, IL-6, prediction modeling.

64  
65 Correspondence should be directed to:

66  
67 <sup>16</sup>Corresponding Author Responsible for Content:

68  
69 Lyle L. Moldawer, Ph.D.  
70 Sepsis and Critical Illness Research Center  
71 Department of Surgery  
72 room 6116, Shands Hospital  
73 University of Florida College of Medicine  
74 Gainesville, Florida 32610-0019  
75 [moldawer@surgery.ufl.edu](mailto:moldawer@surgery.ufl.edu)  
76 352, 265-0494  
77

77

78

79 **Conflict of Interest Statements:**

80 Evan A. Barrios, M.D. reports institutional support for salary from a National Institute of  
81 General Medical Sciences training grant in burns, trauma and sepsis (T32 GM-008721) (PAE).

82 Monty B. Mazer, M.D. is a member of Immune Functional Diagnostics, LLC and receives no  
83 direct financial compensation. Immune Functional Diagnostics, LLC is developing predictive  
84 metrics in critical illness and this technology is evaluated in this research.

85 Patrick McGonagill M.D. reports no conflicts of interest.

86 Christian B. Bergmann, M.D. is supported by grants from the Deutsche  
87 Forschungsgemeinschaft (German Research Foundation) (BE 7016/1-1).

88 Michael D. Goodman, M.D. reports institutional support for salary from the National Institute of

89 General Medical Sciences (R01 GM-124156) and the Department of Defense (G102983-  
90 6263608307-1).

91 Robert W. Gould, M.D. reports no conflicts of interest.

92 Mahil Rao M.D., Ph.D. reports no conflicts of interest.

93 Valerie Polcz, M.D. reports institutional support for salary from a National Institute of General  
94 Medical Sciences training grant in burns, trauma and sepsis (T32 GM-008721) (PAE).

95 Ruth Davis, B.S.N, R.N. reports no conflicts of interest.

96 Drew Del Toro, M.D. reports no conflicts of interest.

97 Marvin Dirain, M.S. reports no conflicts of interest.

98 Alexandra Dram reports no conflicts of interest.

99 Lucas Hale, B.A. reports no conflicts of interest.

100 Mohammad Heidarian, M.S. reports no conflicts of interest.

101 Tamara A. Kucaba, B.S. reports no conflicts of interest.

102 Jennifer P. Lanz, M.S.N., R.N. reports no conflicts of interest.

103 Ashley McCray, R.N. reports no conflicts of interest.

104 Sandra Meszaros reports no conflicts of interest.

105 Sydney Miles, B.S. reports no conflicts of interest.

106 Candace Nelson, B.A. reports no conflicts of interest.

107 Ivanna Rocha, M.P.H. reports no conflicts of interest.

108 Elvia E Silva, M.S. reports no conflicts of interest.

109 Ricardo Ungaro, B.S. reports no conflicts of interest.

110 Andrew Walton, M.S. reports no conflicts of interest.

111 Julie Xu, B.S. reports no conflicts of interest.

112 Leilani Zeumer-Spataro, B.S. reports no conflicts of interest.

113 Muxuan Liang, Ph.D. reports no conflicts of interest.

114 Isaiah Turnbull, M.D is a member of Immune Functional Diagnostics, LLC and receives no  
115 direct financial compensation. Immune Functional Diagnostics, LLC is developing predictive  
116 metrics in critical illness and this technology is evaluated in this research. He is also supported  
117 by R35 GM-133756 from the National Institute of General Medical Sciences.

118 Letitia E. Bible, M.D. reports no conflict of interest.

119 Tyler Loftus, M.D. is supported by R01 GM-149657 from the National Institute of General  
120 Medical Sciences.

121 Philip A. Efron, M.D. is supported by grants R35 GM-140806, T32 GM-008721 and RM GM-  
122 139690 awarded by the National Institute of General Medical Sciences.

123 Kenneth E. Remy, M.D., M.S. is a member of Immune Functional Diagnostics, LLC and  
124 receives no direct financial compensation. Immune Functional Diagnostics, LLC is developing  
125 predictive metrics in critical illness and this technology is evaluated in this research.

126 Scott Brakenridge, M.D., M.S.C.S. is funded by R35 GM-134880 from the National Institute of  
127 General Medical Sciences. Dr. Brakenridge and the University of Florida may receive royalty  
128 income based on a technology developed by Dr. Brakenridge and others and licensed by  
129 Washington University in St. Louis to IFDx LLC. That technology is evaluated in this research.

130 Vladimir P. Badovinac Ph.D. is funded by R35 GM-134880 from the National Institute of  
131 General Medical Sciences.

132 Thomas S. Griffith, Ph.D. is funded by R35 GM-140881 from the National Institute of General  
133 Medical Sciences and the recipient of a Research Career Scientist award (IK6BX006192) from  
134 the Department of Veteran Affairs.

135 Lyle L. Moldawer, Ph.D. is supported by NIH grants RM1 GM-139690, R01GM-132364 and  
136 RF1 NS128626. Dr. Moldawer and the University of Florida may receive royalty income based  
137 on a technology developed by Dr. Moldawer and others and licensed by Washington University  
138 in St. Louis to IFDx LLC. That technology is evaluated in this research.

139 Richard S. Hotchkiss, M.D. Dr. Hotchkiss and Washington University in St. Louis may receive  
140 royalty income based on a technology developed by Dr. Hotchkiss and others and licensed by  
141 Washington University in St. Louis to IFDx LLC. That technology is evaluated in this research.  
142 He is also supported by R35 GM-126928, awarded by the National Institute of General Medical  
143 Sciences.

144 Charles C. Caldwell, Ph.D. Dr. Caldwell and the University of Cincinnati may receive royalty  
145 income based on a technology developed by Dr. Caldwell and others and licensed by  
146 Washington University in St. Louis to IFDx LLC. That technology is evaluated in this research.

147

148 **Abbreviations**

- 149 ALC, absolute lymphocyte count
- 150 AMA, discharged against medical advice
- 151 AUROC, area under the receiver-operator curve
- 152 CINS, critically ill, nonseptic cohort of patients
- 153 CTSI, UF Clinical and Translational Science Institute
- 154 ELISpot, enzyme-linked immunospot assay
- 155 HLA-DR, human leukocyte antigen DR isotype
- 156 IFN $\gamma$ , interferon- $\gamma$
- 157 IL-6, interleukin 6
- 158 IL-10, interleukin 10
- 159 IPR, in-patient rehabilitation
- 160 LTAC, long-term acute care facility
- 161 mAb, monoclonal antibody
- 162 PBMC, peripheral blood mononuclear cell
- 163 SEPSIS, critically ill, sepsis cohort of patients
- 164 SFU, ELISpot spot forming units
- 165 SNF, specialized nursing facility
- 166 SOFA, sequential organ failure assessment score
- 167 sPD-L1, soluble programmed death ligand-1
- 168 SS, ELISpot spot size
- 169 TE, ELISpot total expression
- 170

171 **Abstract**

172 **Background:** Sepsis remains a major clinical challenge for which successful treatment  
173 requires greater precision in identifying patients at increased risk of adverse outcomes  
174 requiring different therapeutic approaches. Predicting clinical outcomes and immunological  
175 endotyping of septic patients has generally relied on using blood protein or mRNA biomarkers,  
176 or static cell phenotyping. Here, we sought to determine whether functional immune  
177 responsiveness would yield improved precision.

178 **Methods:** An *ex vivo* whole blood enzyme-linked immunosorbent (ELISpot) assay for cellular  
179 production of interferon- $\gamma$  (IFN- $\gamma$ ) was evaluated in 107 septic and 68 non-septic patients from  
180 five academic health centers using blood samples collected on days 1, 4 and 7 following ICU  
181 admission.

182 **Results:** Compared with 46 healthy subjects, unstimulated and stimulated whole blood IFN $\gamma$   
183 expression were either increased or unchanged, respectively, in septic and nonseptic ICU  
184 patients. However, in septic patients who did not survive 180 days, stimulated whole blood  
185 IFN $\gamma$  expression was significantly reduced on ICU days 1, 4 and 7 (all  $p < 0.05$ ), due to both  
186 significant reductions in total number of IFN $\gamma$ -producing cells and amount of IFN $\gamma$  produced  
187 per cell (all  $p < 0.05$ ). Importantly, IFN $\gamma$  total expression on day 1 and 4 after admission could  
188 discriminate 180-day mortality better than absolute lymphocyte count (ALC), IL-6 and  
189 procalcitonin. Septic patients with low IFN $\gamma$  expression were older and had lower ALC and  
190 higher sPD-L1 and IL-10 concentrations, consistent with an immune suppressed endotype.

191 **Conclusions:** A whole blood IFN $\gamma$  ELISpot assay can both identify septic patients at increased  
192 risk of late mortality, and identify immune-suppressed, sepsis patients.

193 (word count: 249)

194

195 **Trial Registry:** Because the study is a prospective observational study, and not a clinical trial,  
196 registration with *clinical trials.gov* is not required.

197

198

199 **Introduction**

200 Sepsis remains one of the most common causes of critical illness and too often leads to death  
201 and morbidity (1-3). Importantly, sepsis is a pathophysiologic host response to microbial  
202 infection associated with organ injury and dysfunction (4). However, the nature and magnitude  
203 of the host response to sepsis is highly variable depending upon the subject's age,  
204 comorbidities and source and severity of microbial infection. Although sepsis is frequently  
205 associated with an early exaggerated inflammatory response (5), persistent inflammation (6,7),  
206 coagulopathy (8), prolonged immune suppression (3,6,9-12), and lean tissue wasting (13,14),  
207 the contribution of these individual responses to the overall outcome of the patient is still  
208 unresolved (15,16). Precision medicine has been proposed as a tool to identify which  
209 immunologic endotype drives organ injury and is an appropriate target for therapeutic  
210 intervention (17). Biomarkers, based on static blood cell phenotypes, protein and  
211 transcriptomic metrics have been commonly used to endotype critically ill patients with and  
212 without sepsis (15,17-20).

213 Enzyme-Linked ImmunoSpot assay (ELISpot) is a widely used immunological technique that  
214 enables the detection and quantification of individual cells responding to external receptor-  
215 specific and nonspecific stimulants and secreting specific proteins, particularly cytokines (21).  
216 This method is important for studying the immune response at the single-cell level, offering  
217 valuable insights into immune cell function, and immune-related diseases. Its ability to analyze  
218 immune responses at the cellular level makes it particularly suitable for monitoring immune  
219 system functionality in sepsis. In the current report, we examined the extent to which whole  
220 blood ELISpot production of interferon  $\gamma$  (IFN $\gamma$ ) can identify immune suppressed, critically ill  
221 patients at increased risk of death.



## 222 **Materials and Methods**

223 This multi-center, prospective diagnostic and prognostic study conducted between February  
224 23, 2021, and July 22, 2022, enrolled two cohorts of critically ill patients at the time of ICU  
225 admission. The first cohort included patients with a suspected diagnosis of sepsis admitted to  
226 the ICU (SEPSIS). The second cohort included critically ill patients admitted to the ICU without  
227 currently suspected sepsis (Critically Ill, Non-Septic; CINS), but considered at high risk for  
228 subsequent infection (e.g., postoperative, severe trauma). Patient enrollment is shown in  
229 **Figure 1**, consistent with Enhancing the Quality and Transparency of Health Research  
230 Standards for Reporting of Diagnostic Accuracy (STARD) reporting guidelines (22). All patients  
231 were managed under institutional clinical management protocols. Centralized ethics approval  
232 was obtained from the University of Florida Institutional Review Board (#IRB 202000924)  
233 which served as the sponsoring institution. Written informed consent was obtained from each  
234 patient or their proxy decision-maker at individual clinical sites.

235 A heparinized blood collection tube (Becton Dickinson) was obtained within the first three days  
236 of ICU admission (labeled as day 1), and on subsequent days 3 through 5 (labeled as day 4),  
237 and weekly thereafter ( $\pm$  2 days). Self- or proxy-reported race and ethnicity category data were  
238 collected as per National Institutes of Health reporting guidelines and requirements.

239 Inclusion criteria consisted of ICU admission from the emergency department for community-  
240 acquired sepsis or severe trauma (patients with Injury Severity Scores  $>15$ , hemorrhagic  
241 shock, and/or severe chest trauma), as well as non-trauma, postoperative ICU admission, ICU  
242 transfer from the emergency department and inpatient transfer from ward to ICU.

243 Sepsis was defined according to Sepsis-3 criteria (4), and all subjects were clinically

244 adjudicated at the individual participating sites. Patients admitted to the ICU for critical illness,  
245 non-sepsis (CINS) were also adjudicated to rule out sepsis. A detailed summary of inclusion  
246 and exclusion criteria is provided in the **Supplemental Materials and Methods**.

247 Healthy control subjects were recruited at each of the clinical sites. Efforts were made to age,  
248 sex and race-ethnicity match the healthy control subjects to the SEPSIS cohort. Individuals  
249 with autoimmune diseases being treated with biologic immune modulators were excluded, as  
250 were individuals who had received anti-neoplastic therapies or diagnosed with cancer within  
251 the past six months. Vulnerable populations were also excluded.

## 252 **Primary Outcomes and Clinical Adjudication**

253 The primary clinical outcome for ELISpot was 180-day mortality, determined via clinical  
254 records and telephone follow-up with the patient, their proxy, or their designated contact, and  
255 cross-checked through the US Social Security Death Index. We analyzed temporal trends of  
256 ELISpot in both SEPSIS and CINS patients but compared estimated performance of predictive  
257 models primarily in the SEPSIS patients, as 180-day mortality in the CINS cohort was <4%.  
258 Final sepsis or CINS adjudication was performed by physician-investigator determination at  
259 each clinical site at completion of each patient's hospital course.

260 Secondary clinical outcome variables included all-cause (in hospital, 30-day) mortality,  
261 development of chronic critical illness (CCI), secondary infections, and poor discharge  
262 disposition. Inpatient clinical trajectory was defined as "early death", "rapid recovery", or "CCI".  
263 CCI was defined as an ICU length of stay  $\geq 14$  days with evidence of persistent organ  
264 dysfunction (SOFA score  $\geq 2$ ) (23). Hospitalized patients who died after an ICU length of stay  
265 >14 days from the index hospitalization were also classified as CCI. Poor disposition was

266 defined as discharge to a skilled nursing facility (SNF), long-term acute care facility (LTAC), or  
267 hospice. Secondary infections were defined as per the US Centers for Disease Control and  
268 Prevention criteria.

## 269 **ELISpot**

270 ELISpot assays were conducted using the human IFN $\gamma$  Immunospot<sup>®</sup> kit (CTL Inc., Cleveland,  
271 OH) with several important modifications including the use of diluted whole blood as previously  
272 described (21). Specifically, 100  $\mu$ l of heparinized whole blood was diluted 1:10 with kit buffer  
273 and 50  $\mu$ l of the diluted sample was added to each well. Samples were incubated in wells  
274 containing either buffer alone or a soluble anti-CD3/anti-CD28 (125 ng/ml/1.25  $\mu$ g/ml) mAb  
275 agonist (BioLegend, San Diego, CA). Samples were assayed in duplicate. Optimal  
276 concentrations of agonist were determined in preliminary studies (see **Supplemental**  
277 **Materials and Methods**).

278 Samples were quantitated using a CTL S6 Entry or S6 FluoroCore<sup>™</sup> ELISpot reader at each  
279 clinical site. To assure comparable results, the instruments were harmonized by CTL Inc. prior  
280 to study using an external standard across all five clinical sites. Results are presented as the  
281 number of spot-forming units (SFU), spot size ( $\mu$ m<sup>2</sup>; SS) and total expression ( $\mu$ m<sup>2</sup>; TE) a  
282 product of the number of spots and mean spot size using the Immunospot<sup>®</sup> SC software suite  
283 (version 7.0.30.4). Spot forming units represent individual blood cells expressing IFN $\gamma$  and spot  
284 size is an indication of the amount of IFN $\gamma$  produced per cell. In subsequent analyses, the  
285 number of IFN $\gamma$ -producing cells was adjusted for each individual patient's absolute lymphocyte  
286 count to yield the percentage of total lymphocytes expressing IFN $\gamma$ .

287 **Additional Laboratory Analyses**

288 Whole blood total leukocyte and absolute lymphocyte counts were determined on EDTA-  
289 anticoagulated whole blood at the individual clinical sites either using their hospital's Clinical  
290 and Diagnostics Laboratory or a research Beckman-Coulter Dx500 or Dx900 hemocytometer  
291 (Brea, CA). Cytokine and additional plasma protein analyses were conducted at the University  
292 of Florida Sepsis and Critical Illness Research Center (SCIRC) where they were determined in  
293 batch using the Luminex MagPix<sup>®</sup> (Austin, TX) platform using commercial reagents.

294 Excess sample was stored at the Biorepository of the Clinical and Translational Science  
295 Institute (<https://www.ctsi.ufl.edu/research/laboratory-services/ctsi-biorepository-2/>) where it is  
296 available to the scientific community under guidelines promulgated by the National Institute of  
297 General Medical Sciences.

298 **Data Collection and Analysis**

299 Clinical data collection was conducted at each site and entered into a web-based electronic  
300 case report form created on the REDCap<sup>™</sup> platform managed by the University of Florida  
301 Clinical and Translational Science Institute (CTSI). Access to the case report form was  
302 password protected and limited to only approved research staff, and all interactions with the  
303 database were recorded. Peer-to-peer communication allowed approved individuals at all five  
304 sites access to their own data and de-identified data from the other four clinical sites. Research  
305 data, including ELISpot, total leukocyte and absolute lymphocyte counts, and plasma protein  
306 and cytokine data were uploaded into the case report forms from the University of Florida  
307 SCIRC. Data managers at the SCIRC were responsible for creating final locked datasets for  
308 subsequent analysis.

## 309 **Statistical Analysis**

310 Descriptive data are presented as frequencies and percentages or medians and IQRs. The  
311 Fisher exact test and Mann-Whitney or Kruskal-Wallis ANOVA tests were used for categorical  
312 and continuous variables, respectively. Area under the receiver operating characteristics curve  
313 (AUROC) values with 95% confidence intervals (computed with 2000 stratified bootstrap  
314 replicates) were used to assess discrimination. Univariable and multivariable logistic  
315 regression were performed to assess whether the combination of metrics improved overall  
316 performance. Post hoc tests were performed for continuous outcomes using the Dunn test. For  
317 post hoc analyses of categorical outcomes, separate 2 × 2 Fisher exact tests were performed.  
318 All significance tests were 2-sided, with a raw  $p \leq 0.05$  considered statistically significant.  
319 Analyses were performed using the R Project statistical package, version 4.1.0 (R Project for  
320 Statistical Computing).

## 321 **Results**

### 322 **Patient Characteristics**

323 Demographic characteristics of the 175 enrolled patients (99 men [57%] and 76 women [43%])  
324 and 46 healthy control subjects (16 men [36%], 30 women [64%]) are summarized in **Table 1**.  
325 The overall cohort included 107 and 68 patients in the SEPSIS and CINS cohorts, respectively.  
326 Patient characteristics were similar across all three cohorts with the exception that the healthy  
327 control subjects were more predominantly female and younger, and SEPSIS patients had a  
328 higher Charlson comorbidity index than CINS subjects (**Table 1**). Within the CINS cohort  
329 ( $n = 68$ ), reason for ICU admission was identified in **Supplemental Table 1**.

330 **Table 2** shows clinical outcomes for the SEPSIS and CINS patients. Hospital length of stay  
331 ( $p<0.02$ ), incidence of secondary infections ( $p<0.001$ ), development of CCI ( $p<0.001$ ), and in-  
332 hospital mortality ( $p<0.01$ ) were all significantly higher in SEPSIS than in CINS patients.  
333 Disposition at discharge also significantly differed between SEPSIS and CINS patients, as did  
334 30- and 180-day mortality (both  $p<0.01$ ).

### 335 **IFN $\gamma$ Production by Unstimulated and anti-CD3/CD28 mAb-Stimulated Whole Blood**

336 Comparison of the first sample collected (days 1-3 post ICU admission) among the three  
337 cohorts revealed considerable heterogeneity in the individual subject response, irrespective of  
338 the cohort. Surprisingly, as a group, spontaneous IFN $\gamma$  production in *unstimulated* whole blood  
339 was significantly increased from SEPSIS and CINS patients than from healthy subjects at all  
340 sampling intervals (days 1, 4 and 7), despite a significant reduction in lymphocyte numbers  
341 (**Figure 2, Supplemental Figure 1**). This was reflected generally by an increased number of  
342 IFN $\gamma$ -producing cells (SFU) (all  $p<0.05$ );, although the amount of IFN $\gamma$  produced by each cell  
343 (SS) was increased on day 4 (**Figure 3**). When the total number of IFN $\gamma$  producing cells was  
344 adjusted for the absolute lymphocyte count, the percentage of lymphocytes expressing IFN $\gamma$   
345 was further increased significantly in both SEPSIS and CINS ( $p<0.001$ ; **supplemental Figure**  
346 **2**). There was no difference between unstimulated IFN $\gamma$  expression between the SEPSIS and  
347 CINS cohorts.

348 *Ex vivo* stimulation of the whole blood from the three cohorts with agonist anti-CD3/CD28 mAb  
349 resulted in expected increases in the total expression of IFN $\gamma$  produced when compared with  
350 unstimulated samples. There were also increase in the total amount of IFN $\gamma$  produced per unit

351 volume of blood on days 4 and 7 when comparing CINS to healthy subjects (**Figure 2**). This  
352 increased IFN $\gamma$  expression was only seen on day 4 in SEPSIS patients.

### 353 **Influence of Outcome on ELISpot Responses**

354 SEPSIS subjects had a greater in-hospital, 30- and 180-day mortality when compared to CINS  
355 patients (**Table 2**). In addition, the incidence of secondary infections, development of CCI and  
356 an adverse discharge disposition were all significantly greater in SEPSIS than CINS patients  
357 (all  $p < 0.05$ ).

358 SEPSIS subjects who died within 180 days of ICU admission did not differ from surviving  
359 patients based on their admission or day 1 SOFA scores or total leukocyte numbers, even  
360 though non-surviving SEPSIS patients were significantly older and had higher Charlson  
361 comorbidity scores (both  $p < 0.05$ ; **Supplemental Table 1**). Interestingly, there were marked  
362 differences in the IFN $\gamma$  production from stimulated whole blood between sepsis subjects who  
363 survived or did not survive 180 days. Both the absolute number (SFU) and percentage of IFN $\gamma$   
364 producing cells, and the spot size (SS) were significantly lower, and therefore, total expression  
365 (TE) was reduced in non-surviving versus surviving SEPSIS patients (all  $p < 0.05$ ; **Figure 4**).  
366 This reduction in expression was, in general, sustained through day 4 in non-survivors (**Figure**  
367 **4**). After 7 days, there were too few ICU-remaining patients to continue the comparison (*data*  
368 *not shown*). Surprisingly, IFN $\gamma$  production from *unstimulated* whole blood did not differ between  
369 surviving and non-surviving patients at any time point (*data not shown*). There also did not  
370 appear to be any significant changes in ELISpot responses (both stimulated and unstimulated)  
371 over time in either surviving or non-surviving individual SEPSIS patients (*data not shown*).

372 **Univariate and Multivariate Prediction Models for Long-term Survival and Secondary**  
373 **Outcomes.**

374 Because of the differences in IFN $\gamma$  expression between surviving and non-surviving SEPSIS  
375 patients, ELISpot AUROCS were evaluated for their discriminatory prediction of long-term  
376 survival (180 day), as well as secondary outcomes, and compared to clinical indices (SOFA,  
377 Charlson comorbidity scores), total white blood cell and absolute lymphocyte counts, and  
378 plasma protein markers (selected cytokines, procalcitonin, and sPD-L1) in the SEPSIS  
379 patients. Similar combined SEPSIS and CINS analyses could not be performed due to the low  
380 mortality in CINS patients. Results are presented in **Table 3** and **Figure 5**.

381 Similar to data reported by ourselves and others (24-26), the most consistent discriminator of  
382 180-day mortality was the Charlson comorbidity score (AUROC; 0.824 [CI 0.700-0.948], which  
383 also discriminated in-hospital mortality (0.762 [0.611-0.912]) and development of CCI (0.713  
384 [0.594-0.832]), but not the incidence of secondary infection (0.549 [0.426-0.673]. Importantly,  
385 stimulated total IFN $\gamma$  expression at day 1 and day 4 did not significantly differ from the  
386 Charlson comorbidity score with AUROCs of 0.730 (0.601-0.859) and 0.794 (0.691-0.897),  
387 respectively. Total IFN $\gamma$  expression on day 4 also discriminated in-hospital mortality with an  
388 AUROC of 0.743 (0.615-0.830), but it was not a strong discriminator of either development of  
389 CCI or incidence of secondary infections.

390 For total stimulated IFN $\gamma$  expression, the components contributing to its discriminative power  
391 for 180-day mortality were both the number of IFN $\gamma$  producing cells (SFU; Day 1, 0.707 [0.568-  
392 0.846] and the amount of IFN $\gamma$  produced by individual cells (SS; Day 1, 0.707 [0.568-0.846]).



393 The discriminatory power of the ELISpot total expression (TE) for predicting both in-hospital  
394 and 180-day mortality was much greater than seen for either absolute lymphocyte count  
395 (ALC), IL-6, or procalcitonin at either day 1 or day 4, or for changes in these parameters  
396 between days 1 and 7 (**Table 3**). In addition, the last ELISpot measurement obtained from the  
397 patient prior to discharge or death (usually day 7 or later) was also found to be not as  
398 discriminatory as the earlier day 1 and 4 measurements (*data not shown*).

399 Setting the threshold for day 1 and day 4 stimulated total IFN $\gamma$  expression at approximately  
400 80% sensitivity to discriminate 180-day survival, it was possible to assess the  
401 immunosuppressive endotype of those SEPSIS patients with reduced ELISpot total expression  
402 (**Table 4**). These individuals were older and had absolute lymphocyte counts significantly lower  
403 at both days 1 and 4 than SEPSIS patients above the ELISpot threshold. In addition, plasma  
404 sPD-L1 concentrations were significantly higher on day 4. Patients below the ELISpot  
405 threshold also had in-hospital and 180-day mortality, and development of CCI at a markedly  
406 higher frequency than those individuals above the threshold (all  $p < 0.05$ ).

407 Finally, to examine whether ELISpot could improve the discriminatory power of standard  
408 clinical indices (SOFA and Charlson comorbidity scores), single and multivariate logistic  
409 regression analyses were performed and the AUROCs of the models were calculated by a  
410 four-fold cross-validation procedure (**Table 5**). Model I was built on baseline Charlson  
411 comorbidity data and day 1 SOFA scores yielding AUROCs for 180-day mortality (0.911  
412 [0.858-0.965]); the odds ratios show baseline Charlson comorbidity data and day 1 SOFA  
413 scores are significant predictors for 180-day mortality (**Table 5**). Model II was built on  
414 stimulated total IFN $\gamma$  expression from Day 4 yielding AUROCs for 180-day mortality (0.794

415 [0.732-0.855]); the odds ratios show stimulated total IFN $\gamma$  expression is a significant predictor  
416 for 180-day mortality (**Table 5**). Although ELISpot data show significant odds ratios in Model II,  
417 the addition of stimulated total IFN $\gamma$  expression to the model built on standard score indices  
418 (Model III) did not significantly increase either the AUROC or the odds ratio for 180-day (0.915  
419 [0.851-0.979] or in-hospital mortality (0.883 [0.801-0.964]), or development of CCI (0.861  
420 [0.830-0.892]) (**Table 5**).

## 421 **Discussion**

### 422 **Key Findings**

423 This prospective, multi-center observational study has demonstrated that the adaptive immune  
424 response to critical illness, as defined by *ex vivo* whole blood production of IFN $\gamma$  in response to  
425 T cell receptor stimulation, varied in response to critical illness (**Figures 2, 3**) and could also  
426 discriminate long-term outcomes (**Figure 5, Table 3**). Spontaneous IFN $\gamma$  production by diluted  
427 whole blood was significantly increased in critically ill patients, irrespective of whether the  
428 critically ill patients were septic. In addition, when whole blood was stimulated *ex vivo* with a T  
429 cell receptor agonist, IFN $\gamma$  production increased dramatically in both healthy and critically ill  
430 cohorts (both SEPSIS and CINS). However, stimulated ELISpot IFN $\gamma$  total expression early in  
431 the admission to the ICU significantly differed between septic patients who survived 180 days  
432 and those who died, and this reduction in total expression in non-surviving septic patients was  
433 due to both reductions in the total number of IFN $\gamma$  producing blood cells and the amount of  
434 IFN $\gamma$  produced by individual cells (**Figure 4**). Importantly, day 1 and day 4 measurements were  
435 more discriminatory than later measurements. Using univariate modeling, stimulated ELISpot

436 total expression measured in the first week of admission (sampling days 1 and 4) could  
437 differentiate 180-day mortality as well as SOFA and Charlson comorbidity scores, and  
438 markedly better than blood ALC, procalcitonin, IL-6 and sPD-L1 concentrations (**Table 3**).  
439 Septic patients who had low stimulated ELISpot total IFN $\gamma$  expression at days 1 and 4 had an  
440 immunosuppressed endotype, as reflected in being older, and having lower ALC counts,  
441 higher plasma sPD-L1, and increased incidence of chronic critical illness, in-hospital and late  
442 mortality (**Table 4**). However, in multivariate models, stimulated ELISpot total IFN $\gamma$  expression  
443 did not significantly improve the discrimination between 180-day survival in models built with  
444 SOFA and Charlson comorbidity scores (**Table 5**).

#### 445 **Context**

446 ELISpot has emerged as a powerful method to assess immunological status in a variety of  
447 clinical disorders (27-30), including sepsis and critically ill patients (20,21,31,32). It offers  
448 several theoretical advantages over other current metrics – for example, cell phenotypes (such  
449 as ALC (33-36) and HLA-DR expression on CD14<sup>+</sup> blood cells (37,38)), plasma protein  
450 concentrations (such as procalcitonin (39-42), IL-6 (43-45) and sPD-L1 (46,47)) or blood  
451 transcriptomics (26,48,49) – used to predict both the severity of the host response and the  
452 immunosuppressed endotype. ELISpot, unlike these static measures, assesses one  
453 component of the functional status of the host protective immune response. In the present  
454 study, ELISpot revealed the capacity of T cells in the blood to produce IFN $\gamma$  with and without  
455 stimulation through the T cell receptor.

456 This study is not the first to demonstrate reduced IFN $\gamma$  ELISpot expression in sepsis patients,  
457 especially in those with adverse clinical outcomes (20,21,50). However, in contrast to these

458 previous studies, we used diluted whole blood in our ELISpot assay instead of isolated PBMCs  
459 and observed increased IFN $\gamma$  production in both unstimulated and stimulated whole blood from  
460 critically ill patients. There are two key advantages of using diluted whole blood in the ELISpot.  
461 First, the use of whole blood permits the assay to take place with the entire blood composition  
462 (i.e., all leukocytes, erythrocytes, platelets, and plasma proteins and metabolites) maintained.  
463 Responses to critical illness and *ex vivo* stimulation may be either direct or be mediated via  
464 cell-cell communication and/or plasma mediators. Traditional processing of blood by density  
465 gradient centrifugation separates the PBMC from the neutrophils, platelets, and plasma.  
466 Second, it is a simpler and more 'rapid' assay to set up because there is no required cell  
467 isolation step.

468 On days 1-7, both the CINS and SEPTIC patients had reduced ALC as compared to healthy  
469 controls (**Supplemental Figure 1**). Surprisingly, despite this lymphopenia, the number of  
470 lymphocytes spontaneously producing IFN $\gamma$  was higher in both CINS and SEPSIS patients  
471 versus healthy controls at all three time points (**Figure 2**). Day 1 stimulated IFN $\gamma$  SFU, spot  
472 size (SS), and total expression did not differ between cohorts. However, on Day 4, both the  
473 number of cells producing IFN $\gamma$  as well as total expression of IFN $\gamma$  was higher in both the  
474 CINS and SEPSIS cohorts as compared healthy subjects. On Day 7, the number of cells  
475 producing IFN $\gamma$  remained higher in the CINS and SEPSIS cohorts. Of note, the amount of IFN $\gamma$   
476 produced on a per cell basis (reflected by spot size) was lowest in the SEPSIS cohort with total  
477 expression similar to healthy controls.

478 Given the considerable amount of data showing sepsis can evolve into an immunosuppressed  
479 state, it was surprising to see both the spontaneous and stimulated IFN $\gamma$  production increase

480 in septic patients (early after admission) versus healthy subjects. There are several likely  
481 explanations for this apparent paradox. The first potential explanation relates to timing;  
482 specifically, the data presented herein came from blood samples collected within the first 7  
483 days after ICU admission. It is difficult to determine exactly when the sepsis-induced  
484 hyperinflammation transitions to a state of immunoparalysis, but it is tempting to speculate that  
485 our assessment of immune fitness was still within the window of hyperinflammation and  
486 exacerbated immune cell activity.

487 A second explanation has been termed “*bystander activation*” (51,52). The inflammatory  
488 response that develops during infection has a capacity to trigger antigen-experienced effector  
489 and/or memory CD8<sup>+</sup> T cells present in a T cell receptor-independent and cytokine-dependent  
490 manner. A number of cytokines including IL-12, IL-15, TNF $\alpha$ , and IL-18 induce CD8<sup>+</sup> T cell  
491 activation and resultant IFN $\gamma$  production (53). Thus, the sepsis cytokine milieu likely primes  
492 pre-existing, effector and memory CD8<sup>+</sup> T cells to produce IFN $\gamma$  in a cognate antigen-  
493 independent fashion (**Figure 2**). In addition, these cytokine-primed effector/memory CD8<sup>+</sup> T  
494 cells will also respond with IFN $\gamma$  production to a myriad of cytokines produced *ex vivo* during  
495 anti-CD3/CD28 stimulation.

496 A third explanation may lie in the differences in the lymphocyte subsets present in the  
497 peripheral blood of healthy subjects versus CINS and SEPSIS patients at the time of blood  
498 collection. *De novo* clonal expansion of pathogen-specific effector CD8<sup>+</sup> T cells in response to  
499 sepsis-inducing pathogens and resultant inflammation leads the potential for a preponderance  
500 of active response effector cells – especially early in the septic timeline. In contrast, healthy  
501 control volunteers are more likely to have ‘resting’ naïve and memory T cells and a minimal (if

502 any) increase in inflammatory cytokines. Consequently, the number of T cells capable of  
503 rapidly responding to polyclonal and/or bystander cytokine stimulations and produce IFN $\gamma$  in  
504 the ELISpot assay is increased in SEPSIS patients compared with healthy subjects.

### 505 **Current Work**

506 The current studies add to the body of information suggesting ELISpot examining whole blood  
507 production of IFN $\gamma$  can both discriminate long-term mortality and identify those patients who  
508 may benefit from therapeutic interventions targeting adaptive immunity.

### 509 **Limitations**

510 This study has several limitations. Despite multicenter enrollment, sample sizes were still  
511 relatively small for discriminative modeling. Over the past two decades, improved in-hospital  
512 management has reduced the number of adverse events and in-hospital mortality to sepsis  
513 and critical illness (25,54). Discriminatory analyses could only be conducted in the SEPSIS  
514 cohort as CINS patients had very low in-hospital (1%) and 180-day mortality (4%) (**Table 2**).  
515 Second, every effort was made to match healthy control subjects to the SEPSIS and CINS  
516 cohorts, but the healthy donors used in this study were, as a group, significantly younger and  
517 more frequently female (**Table 1**). Median ages in the healthy control cohort were greater than  
518 45 years, a break point often determined to be associated with increased adverse outcomes in  
519 critically ill patients (25). Despite the multicenter nature of the study, the cohorts still were also  
520 predominantly Caucasian.

### 521 **Future Directions**

522 While the findings presented herein suggest assessing IFN $\gamma$  production by ELISpot can be

523 useful in identifying sepsis patients at risk of long-term mortality and the immune suppressed  
524 endotype, its discriminative ability is similar to SOFA and Charlson comorbidity indices and  
525 does not add significantly to their discriminative power. With that said, SOFA and Charlson  
526 comorbidity indices are rarely used for clinical decision making because they provide no  
527 insights or therapeutic directions into the immunological disturbances associated with sepsis  
528 and adverse outcomes. Application of ELISpot to the clinical armamentarium has the potential  
529 to provide important information regarding which sepsis patients would benefit from targeted  
530 therapy (precision medicine). For example, septic patients who have profound suppression of  
531 stimulated IFN $\gamma$  production may be harmed by therapy with corticosteroids, but might be good  
532 candidates for immune adjuvants therapies to boost their ability to combat invading pathogens.  
533 ELISpot is an FDA-cleared approach for assessing functional immune status to prior  
534 tuberculosis infection and the ELISpot reader used in these studies (CTL S6 Entry) is FDA  
535 510(k) cleared. However, to make these results more actionable, ELISpot results will need to  
536 be obtained within hours, instead of days. Currently, ELISpot results take at least 24 hours to  
537 return, although preliminary data from our consortium suggests the assay can be modified to  
538 produce results in less than 12 hours (*Griffith, T and Caldwell, C., manuscript in preparation*).

539 In addition, ELISpot can be readily used to assess other components of the blood innate and  
540 adaptive immune response simply by varying the stimulant and the readout metric. For  
541 example, innate immune responses have been readily assessed using endotoxin or other TLR  
542 ligands as a whole blood stimulant and TNF $\alpha$  as the readout (20,21). Furthermore, underlying  
543 mechanisms of adaptive or innate immune responses can be explored using alternative  
544 stimulants (30,31,55), simultaneous adjuvants or inhibitors (56), or different readout metrics  
545 (21,55).

546 **Conclusions**

547 ELISpot can assess functional immune status in critically ill patients, predict adverse long-term  
548 outcomes, and identify subsets of patients who may benefit from immunostimulant therapy.



549 **Contributions:**

550 **University of Florida**

551 **EAB** –Investigation, Visualization, Writing-Review and Editing; **PAE**- Resources, Funding  
552 Acquisition, Supervision, Writing-Review and Editing; **ML**-Investigation, Visualization; **LEB**-  
553 Supervision, Investigation, Writing-Review and Editing; **TL**- Supervision, Investigation, Writing-  
554 Review and Editing; **VP**- Investigation, Visualization, **LLM**- Conceptualization, Funding  
555 Acquisition, Resources, Supervision, Project Administration, Writing-Review and Editing; **RU**-  
556 Supervision, Investigation, Visualization, **JPL**- Supervision, Investigation, **MD**-Investigation,  
557 Visualization, **LZS**-Investigation, Visualization, **RD**-Investigation, **AM**-Investigation

558 **University of Iowa**

559 **EES**– Investigation, Visualization; **MH**– Investigation, Visualization; **PMcG** –  
560 Conceptualization, Project Administration; **MR**– Investigation, Visualization; **VPB**–  
561 Conceptualization, Funding Acquisition, Resources, Supervision, Writing-Review and Editing

562 **University of Minnesota**

563 **RWG** – Conceptualization, Project administration; **TSG**– Conceptualization, Funding,  
564 Acquisition, Resources, Supervision, Writing–Review and Editing; **LH**– Project Administration;  
565 **TAK**– investigation, visualization; **CN**– project administration; **JX**– investigation, visualization.

566 **Washington University in St. Louis**

567 **RSH**- Conceptualization, Funding, Acquisition, Resources, Supervision, Writing–Review and  
568 Editing; **DDT**- Investigation, **AD**- Investigation, **SM1**-Investigation, **SM2**-Investigation, **IT**-  
569 Conceptualization, Supervision, Writing-Review and Editing

570 **University of Washington**

571 **SB**- Conceptualization, Funding, Writing–Review and Editing

572 **University of Cincinnati**

573 **CCC**- Conceptualization, Funding, Acquisition, Resources, Supervision, Writing–Review and  
574 Editing; **MDG**- Acquisition, Investigation, Visualization, Supervision. **CBB** – Acquisition,  
575 Investigation

576 **Case Western Reserve University**

577 **MBM**- Conceptualization, Supervision, Investigation, Writing-Review and Editing; **KR**-  
578 Conceptualization, Investigation, Acquisition, Writing-Review and Editing.

579

580

581 **Acknowledgements:** This work was directly supported by R01 GM-132364, awarded by the  
582 National Institute of General Medical Sciences, including a supplement (R01 GM-132364-  
583 03S1) in 2022-2024.

584 Additional support was provided by grants T32 GM-008721 (EAB, VP, PAE), RM1 GM-139690  
585 (LLM, PAE), R01 GM-149657 (TL), R01 GM-124156 (MDG), R35 GM-140806 (PAE), R35 GM-  
586 133756 (IT), R35 GM-134880 (VB), R35 GM-134880 (SB), R35 GM1-40881 (TSG), R35 GM-  
587 12698 (RSH), all from the National Institute of General Medical Sciences, G102983-  
588 6263608307-1 (MDG) from Department of Defense, IK6BX006192 from the Department of  
589 Veteran Affairs (TSG), and BE 7016/1-1 (CD) from the Deutsche Forschungsgemeinschaft  
590 (German Research Foundation) .

591 The authors also wish to gratefully acknowledge the patients and their families for their  
592 willingness to participate in an observational clinical study with no direct benefit to them.

593

594 **References**

- 595 1. Bauer M, et al. Mortality in sepsis and septic shock in Europe, North America and  
596 Australia between 2009 and 2019- results from a systematic review and meta-analysis. *Crit*  
597 *Care*. 2020;24(1):239.
- 598 2. Cecconi M, et al. Sepsis and septic shock. *Lancet*. 2018;392(10141):75-87.
- 599 3. Hotchkiss RS, et al. Sepsis and septic shock. *Nat Rev Dis Primers*. 2016;2:16045.
- 600 4. Singer M, et al. The Third International Consensus Definitions for Sepsis and Septic  
601 Shock (Sepsis-3). *JAMA*. 2016;315(8):801-10.
- 602 5. Silva EE, et al. The Calm after the Storm: Implications of Sepsis Immunoparalysis on  
603 Host Immunity. *J Immunol*. 2023;211(5):711-719.
- 604 6. Darden DB, et al. Biomarker Evidence of the Persistent Inflammation,  
605 Immunosuppression and Catabolism Syndrome (PICS) in Chronic Critical Illness (CCI) After  
606 Surgical Sepsis. *Ann Surg*. 2021;274(4):664-673.
- 607 7. Efron PA, et al. The Persistent Inflammation, Immunosuppression, and Catabolism  
608 Syndrome (PICS) Ten Years Later [published online August 8, 2023]. *J Trauma Acute Care*  
609 *Surg*. doi: 10.1097/TA.0000000000004087.
- 610 8. de Nooijer AH, et al. Complement activation in severely ill patients with sepsis: no  
611 relationship with inflammation and disease severity. *Crit Care*. 2023;27(1):63.
- 612 9. Roth WJ, et al. Characterization of two distinct transglutaminases of murine bone

- 613 marrow-derived macrophages: effects of exposure of viable cells to cigarette smoke on  
614 enzyme activity. *J Leukoc Biol.* 1987;42(1):9-20.
- 615 10. van Oosterom A, Huiskamp GJ. The effect of torso inhomogeneities on body surface  
616 potentials quantified using "tailored" geometry. *J Electrocardiol.* 1989;22(1):53-72.
- 617 11. van der Poll T, et al. The immunopathology of sepsis and potential therapeutic targets.  
618 *Nat Rev Immunol.* 2017;17(7):407-420.
- 619 12. van der Poll T, et al. The immunology of sepsis. *Immunity.* 2021;54(11):2450-2464.
- 620 13. Cox MC, et al. The impact of sarcopenia and acute muscle mass loss on long-term  
621 outcomes in critically ill patients with intra-abdominal sepsis. *J Cachexia Sarcopenia Muscle.*  
622 2021;12(5):1203-1213.
- 623 14. Zhang W, et al. CMV Status Drives Distinct Trajectories of CD4+ T Cell Differentiation.  
624 *Front Immunol.* 2021;12:620386.
- 625 15. Rincon JC, et al. Immunopathology of chronic critical illness in sepsis survivors: Role of  
626 abnormal myelopoiesis. *J Leukoc Biol.* 2022;112(6):1525-1534.
- 627 16. Maslove DM, et al. Redefining critical illness. *Nat Med.* 2022;28(6):1141-1148.
- 628 17. Fenner BP, et al. Immunological Endotyping of Chronic Critical Illness After Severe  
629 Sepsis. *Front Med (Lausanne).* 2020;7:616694.
- 630 18. Scicluna BP, et al. Classification of patients with sepsis according to blood genomic  
631 endotype: a prospective cohort study. *Lancet Respir Med.* 2017;5(10):816-826.

- 632 19. Balch JA, et al. Defining critical illness using immunological endotypes in patients with  
633 and without sepsis: a cohort study. *Crit Care*. 2023;27(1):292.
- 634 20. Loftus TJ, et al. Overlapping but Disparate Inflammatory and Immunosuppressive  
635 Responses to SARS-CoV-2 and Bacterial Sepsis: An Immunological Time Course Analysis.  
636 *Front Immunol*. 2021;12:792448.
- 637 21. Mazer MB, et al. A Whole Blood Enzyme-Linked Immunospot Assay for Functional  
638 Immune Endotyping of Septic Patients. *J Immunol*. 2021;206(1):23-36.
- 639 22. Bossuyt PM, et al. The STARD statement for reporting studies of diagnostic accuracy:  
640 explanation and elaboration. *Ann Intern Med*. 2003;138(1):W1-12.
- 641 23. Gardner AK, et al. The Development of Chronic Critical Illness Determines Physical  
642 Function, Quality of Life, and Long-Term Survival Among Early Survivors of Sepsis in Surgical  
643 ICUs. *Crit Care Med*. 2019;47(4):566-573.
- 644 24. Jouffroy R, et al. Relationship between prehospital modified Charlson Comorbidity Index  
645 and septic shock 30-day mortality. *Am J Emerg Med*. 2022;60:128-133.
- 646 25. Brakenridge SC, et al. Current Epidemiology of Surgical Sepsis: Discordance Between  
647 Inpatient Mortality and 1-year Outcomes. *Ann Surg*. 2019;270(3):502-510.
- 648 26. Brakenridge SC, et al. Evaluation of a Multivalent Transcriptomic Metric for Diagnosing  
649 Surgical Sepsis and Estimating Mortality Among Critically Ill Patients. *JAMA Netw Open*.  
650 2022;5(7):e2221520.
- 651 27. Albareda MC, et al. Distinct Treatment Outcomes of Antiparasitic Therapy in

- 652 Trypanosoma cruzi-Infected Children Is Associated With Early Changes in Cytokines,  
653 Chemokines, and T-Cell Phenotypes. *Front Immunol.* 2018;9:1958.
- 654 28. Shin KH, et al. CMV specific T cell immunity predicts early viremia after liver  
655 transplantation. *Transpl Immunol.* 2018;51:62-65.
- 656 29. Remy KE, et al. Severe immunosuppression and not a cytokine storm characterizes  
657 COVID-19 infections. *JCI Insight.* 2020;5(17)
- 658 30. Puertas MC, et al. VIP-SPOT: an Innovative Assay To Quantify the Productive HIV-1  
659 Reservoir in the Monitoring of Cure Strategies. *mBio.* 2021;12(3):e0056021.
- 660 31. Bonavia AS, et al. Comparison of Rapid Cytokine Immunoassays for Functional  
661 Immune Phenotyping. *Front Immunol.* 2022;13:940030.
- 662 32. Beckmann N, et al. Staging and Personalized Intervention for Infection and Sepsis.  
663 *Surg Infect (Larchmt).* 2020;21(9):732-744.
- 664 33. Podd BS, et al. Early, Persistent Lymphopenia Is Associated With Prolonged Multiple  
665 Organ Failure and Mortality in Septic Children. *Crit Care Med.* 2023;
- 666 34. Denstaedt SJ, et al. Blood count derangements after sepsis and association with post-  
667 hospital outcomes. *Front Immunol.* 2023;14:1133351.
- 668 35. Drewry AM, et al. Persistent lymphopenia after diagnosis of sepsis predicts mortality.  
669 *Shock.* 2014;42(5):383-91.
- 670 36. Zidar DA, et al. Association of Lymphopenia With Risk of Mortality Among Adults in the

- 671 US General Population. *JAMA Netw Open*. 2019;2(12):e1916526.
- 672 37. Bidar F, et al. Concomitant Assessment of Monocyte HLA-DR Expression and Ex Vivo  
673 TNF-alpha Release as Markers of Adverse Outcome after Various Injuries-Insights from the  
674 REALISM Study. *J Clin Med*. 2021;11(1)
- 675 38. Bodinier M, et al. Monocyte Trajectories Endotypes Are Associated With Worsening in  
676 Septic Patients. *Front Immunol*. 2021;12:795052.
- 677 39. Uzzan B, et al. Procalcitonin as a diagnostic test for sepsis in critically ill adults and after  
678 surgery or trauma: a systematic review and meta-analysis. *Crit Care Med*. 2006;34(7):1996-  
679 2003.
- 680 40. Prkno A, et al. Procalcitonin-guided therapy in intensive care unit patients with severe  
681 sepsis and septic shock--a systematic review and meta-analysis. *Crit Care*. 2013;17(6):R291.
- 682 41. Wirz Y, et al. Effect of procalcitonin-guided antibiotic treatment on clinical outcomes in  
683 intensive care unit patients with infection and sepsis patients: a patient-level meta-analysis of  
684 randomized trials. *Crit Care*. 2018;22(1):191.
- 685 42. Andriolo BN, et al. Effectiveness and safety of procalcitonin evaluation for reducing  
686 mortality in adults with sepsis, severe sepsis or septic shock. *Cochrane Database Syst Rev*.  
687 2017;1(1):CD010959.
- 688 43. Tocu G, et al. The Contribution of Procalcitonin, C-Reactive Protein and Interleukin-6 in  
689 the Diagnosis and Prognosis of Surgical Sepsis: An Observational and Statistical Study. *J*  
690 *Multidiscip Healthc*. 2023;16:2351-2359.

- 691 44. Patel RT, et al. Interleukin 6 is a prognostic indicator of outcome in severe intra-  
692 abdominal sepsis. *Br J Surg*. 1994;81(9):1306-8.
- 693 45. Casey LC, et al. Plasma cytokine and endotoxin levels correlate with survival in patients  
694 with the sepsis syndrome. *Ann Intern Med*. 1993;119(8):771-8.
- 695 46. Zeng C, et al. Predictive Value of Soluble Programmed Cell Death Ligand-1 in the  
696 Progression of Septic Patients to Chronic Critical Illness in the Intensive Care Unit: A  
697 Prospective Observational Clinical Study. *Shock*. 2023;60(2):163-171.
- 698 47. Derigs M, et al. Soluble PD-L1 in blood correlates positively with neutrophil and  
699 negatively with lymphocyte mRNA markers and implies adverse sepsis outcome. *Immunol*  
700 *Res*. 2022;70(5):698-707.
- 701 48. Kostaki A, et al. A 29-Mrna Host Response Whole-Blood Signature Improves Prediction  
702 of 28-Day Mortality and 7-Day Intensive Care Unit Care in Adults Presenting to the Emergency  
703 Department with Suspected Acute Infection and/or Sepsis. *Shock*. 2022;58(3):224-230.
- 704 49. Galtung N, et al. Prospective validation of a transcriptomic severity classifier among  
705 patients with suspected acute infection and sepsis in the emergency department. *Eur J Emerg*  
706 *Med*. 2022;29(5):357-365.
- 707 50. Haem Rahimi M, et al. Fully automated interferon-gamma release assay to monitor  
708 antigen-independent T cell functionality: A proof of concept study in septic shock. *Cytokine*.  
709 2023;169:156263.
- 710 51. Kim TS, Shin EC. The activation of bystander CD8(+) T cells and their roles in viral



711 infection. *Exp Mol Med*. 2019;51(12):1-9.

712 52. Martin MD, et al. Bystander responses impact accurate detection of murine and human  
713 antigen-specific CD8 T cells. *J Clin Invest*. 2019;129(9):3894-3908.

714 53. Freeman BE, et al. Regulation of innate CD8+ T-cell activation mediated by cytokines.  
715 *Proc Natl Acad Sci U S A*. 2012;109(25):9971-6.

716 54. Cox MC, et al. Abdominal sepsis patients have a high incidence of chronic critical illness  
717 with dismal long-term outcomes. *Am J Surg*. 2020;220(6):1467-1474.

718 55. Malewicz NM, et al. Early suppression of peripheral mononuclear blood cells in sepsis  
719 in response to stimulation with cytomegalovirus, OKT3, and pokeweed mitogen. *J Appl Physiol*  
720 (1985). 2019;127(6):1539-1547.

721 56. Mazer M, et al. IL-10 Has Differential Effects on the Innate and Adaptive Immune  
722 Systems of Septic Patients. *J Immunol*. 2019;203(8):2088-2099.

723

724 **Table 1. Clinical Characteristics of Patient Cohorts and Healthy Control Subjects.**  
 725 Patients included two cohorts of individuals admitted to the ICU, one presumed to be septic  
 726 (SEPSIS), a second presumed to not be septic, but critically ill and at risk of developing sepsis  
 727 (CINS). Values are obtained at time of admission to the ICU.

|                                    | <b>CINS (n=68)</b> | <b>SEPSIS (n=107)</b> | <b>Healthy Control (n=46)</b> | <b>p value</b> |
|------------------------------------|--------------------|-----------------------|-------------------------------|----------------|
| <b>Male [n (%)]</b>                | 37 (54%)           | 62 (58%)              | 16 (35%)                      | 0.0283         |
| <b>Age, years</b>                  | 59 (37, 67)        | 63 (51, 71)           | 47 (30, 62)                   | <0.0001        |
| <b>BMI, kg/m<sup>2</sup></b>       | 27.3 (22.8, 33.9)  | 28.0 (22.7, 34.8)     | N/C                           | 0.718          |
| <b>SOFA Score</b>                  | 6 (4, 8)           | 6 (4, 10)             | N/C                           | 0.718          |
| <b>Charlson Comorbidity Score</b>  | 2 (0, 4)           | 3 (1, 4)              | 2 (0, 2); n=19                | 0.0045         |
| <b>Total Leukocyte Counts</b>      |                    |                       |                               |                |
| WBC (x10 <sup>3</sup> /μl)         | 9.3 (7.2, 12.6)    | 12.8 (8.9, 18.6)      | 6.5 (5.5, 7.5)                | <0.0001        |
| Monocytes (%)                      | 6.9 (5.2, 9.2)     | 4.6 (3.0, 7.1)        | 6.9 (6.1, 8.0)                | <0.0001        |
| Monocytes (x10 <sup>3</sup> /μl)   | 0.7 (0.4, 0.9)     | 0.7 (0.4, 1.0)        | 0.4 (0.4, 0.6)                | 0.0210         |
| Neutrophils (%)                    | 78.1 (71.9, 86.3)  | 86.1 (81.5, 91.4)     | 10.9 (7.7, 15.9)              | <0.0001        |
| Neutrophils (x10 <sup>3</sup> /μl) | 7.2 (5.1, 10.6)    | 59 (55.2, 64.3)       | 3.7 (2.8, 4.6)                | <0.0001        |
| Lymphocytes (%)                    | 12.4 (7.2, 17.5)   | 6.0 (4.3, 9.0)        | 29.4 (25.6, 35.2)             | <0.0001        |
| Lymphocytes (x10 <sup>3</sup> /μl) | 1.0 (0.7, 1.4)     | 0.8 (0.5, 1.2)        | 1.9 (1.5, 2.3)                | <0.0001        |
| <b>Plasma Proteins</b>             |                    |                       |                               |                |
| IL-10 (pg/ml)                      | 18.3 (14.7, 20.7)  | 20.0 (14.8, 26.3)     | 17.4 (13.6, 20.8)             | 0.059          |
| IL-6 (pg/ml)                       | 35.5 (14.2, 155.9) | 42.2 (19.9, 101.9)    | 5.83 (5.05, 6.92)             | <0.0001        |
| sPD-L1 (pg/ml)                     | 157 (100, 229)     | 204.7 (125.0, 311.7)  | 78.5 (66.5, 93.7)             | <0.0001        |
| Procalcitonin (ng/ml)              |                    |                       |                               |                |

728 **N/C**, not collected

729

730 **Table 2. Clinical Course and Clinical Outcomes in SEPSIS and CINS cohorts.**

|                                 | <b>CINS (n=68)</b> | <b>SEPSIS (n=107)</b> | <b>p value</b> |
|---------------------------------|--------------------|-----------------------|----------------|
| <b>LOS, days</b>                | 10 (7, 14), n=66   | 13 (7, 21), n=106     | 0.016          |
| <b>ICU LOS, days</b>            | 5 (3, 9), n=67     | 4 (2, 10)             | 0.904          |
| <b>Secondary infection</b>      | 17 (29%)           | 52 (59%)              | 0.0003         |
| <b>Favorable discharge</b>      | 52 (76%)           | 61 (57%)              | 0.0018         |
| <b>CCI</b>                      | 3 (4%)             | 15 (14%)              | 0.074          |
| <b>In-Hospital Mortality</b>    | 1 (1.5%)           | 14 (13%)              |                |
| <b>30-Day Mortality</b>         |                    | 12 (11%)              |                |
| <b>180-Day Mortality</b>        |                    | 18 (17%)              |                |
| <b>Disposition at discharge</b> |                    |                       |                |
| <b>Home</b>                     | 25 (37%)           | 27 (25%)              | 0.104          |
| <b>LTAC</b>                     | 0                  | 4 (3.7%)              | 0.017          |
| <b>IPR</b>                      | 17 (25%)           | 12 (11%)              | 0.104          |
| <b>Hospital</b>                 | 0                  | 2 (1.9%)              | 0.406          |
| <b>Other</b>                    | 2 (2.9%)           | 2 (1.9%)              | 0.319          |
| <b>SNF</b>                      | 10 (15%)           | 21 (20%)              | 0.007          |
| <b>Residential facility</b>     | 0                  | 0                     |                |
| <b>Home with services</b>       | 10 (15%)           | 21 (20%)              | 0.843          |
| <b>AMA</b>                      | 2 (2.9%)           | 1 (0.93%)             |                |
| <b>Death</b>                    | 1 (1.5%)           | 14 (13%)              |                |
| <b>Hospice facility</b>         | 1 (1.5%)           | 2 (1.9%)              |                |
| <b>Home with hospice</b>        | 0                  | 1 (0.93%)             |                |

731 *Sample sizes are identified in column headings except where missing values are noted for*  
 732 *specific indices.*

733

734 LOS, length of hospital stay

- 735 LICUS, length of ICU stays
- 736 CCI, chronic critical illness
- 737 LTAC, long term acute care facility
- 738 IPR, inpatient rehabilitation
- 739 SNF, specialized nursing facility
- 740 AMA, discharged against medical advice
- 741

742 **Table 3. Selected Area Under the Receiver Operating Curve Discrimination for Primary**  
 743 **Outcome Variables in the SEPSIS cohorts.** Values represent the mean and 95% confidence  
 744 intervals for the primary outcome variables: 180-Day Mortality, In-Hospital Mortality, Incidence  
 745 of Secondary Infection, Development of Chronic Critical Illness (CCI).  
 746

| Criterion                                | Time Point | 180-day mortality       | In-Hospital Mortality   | Secondary Infection | CCI                     |
|------------------------------------------|------------|-------------------------|-------------------------|---------------------|-------------------------|
| Age                                      | Baseline   | 0.68 (0.54,0.81)        | 0.42 (0.28,0.57)        | 0.48 (0.35,0.60)    | 0.62 (0.46,0.77)        |
| Charlson Comorbidity Score               | Baseline   | <b>0.82 (0.70,0.95)</b> | <b>0.76 (0.61,0.91)</b> | 0.55 (0.43,0.67)    | 0.71 (0.59,0.83)        |
| SOFA                                     | Baseline   | 0.72 (0.57,0.88)        | 0.72 (0.55,0.88)        | 0.59 (0.46,0.71)    | 0.65 (0.49,0.81)        |
|                                          | Day 1      | <b>0.76 (0.62,0.90)</b> | <b>0.76 (0.60,0.92)</b> | 0.65 (0.53,0.77)    | <b>0.76 (0.66,0.87)</b> |
|                                          | Day 4      | <b>0.79 (0.65,0.93)</b> | <b>0.83 (0.67,0.98)</b> | 0.68 (0.56,0.80)    | <b>0.84 (0.74,0.93)</b> |
| ELIspot Stimulated IFN $\gamma$ TE       | Day 1      | 0.73 (0.60,0.86)        | 0.69 (0.55,0.84)        | 0.56 (0.44,0.69)    | 0.60 (0.45,0.75)        |
|                                          | Day 4      | <b>0.79 (0.69,0.90)</b> | <b>0.74 (0.61,0.87)</b> | 0.51 (0.37,0.65)    | 0.62 (0.43,0.81)        |
| ELIspot Stimulated IFN $\gamma$ SFU      | Day 4      | <b>0.74 (0.60,0.88)</b> | 0.65 (0.47,0.84)        | 0.52 (0.39,0.66)    | 0.64 (0.47,0.82)        |
| ELIspot Stimulated IFN $\gamma$ SS       | Day 1      | 0.71 (0.57,0.85)        | 0.68 (0.51,0.85)        | 0.56 (0.44,0.69)    | 0.56 (0.41,0.71)        |
|                                          | Day 4      | 0.66 (0.53,0.79)        | 0.70 (0.55,0.85)        | 0.60 (0.47,0.73)    | 0.52 (0.36,0.68)        |
| % Lymphocytes Stimulated IFN $\gamma$ TE | Day 1      | 0.68 (0.53,0.83)        | 0.62 (0.42,0.81)        | 0.58 (0.45,0.71)    | 0.53 (0.38,0.69)        |
|                                          | Day 4      | 0.60 (0.45,0.76)        | 0.54 (0.32,0.75)        | 0.65 (0.52,0.78)    | 0.58 (0.34,0.71)        |
| Absolute lymphocyte count                | Day 1      | 0.63 (0.45,0.81)        | 0.53 (0.31,0.75)        | 0.58 (0.50,0.72)    | 0.46 (0.27,0.65)        |
|                                          | Day 4      | 0.67 (0.52,0.81)        | 0.64 (0.48,0.80)        | 0.64 (0.51,0.77)    | 0.65 (0.47,0.84)        |
| sPD-L1                                   | Day 4      | 0.67 (0.53,0.80)        | 0.68 (0.52,0.84)        | 0.59 (0.45,0.73)    | 0.57 (0.38,0.77)        |
| IL-6                                     | Day 4      | 0.63 (0.47,0.79)        | 0.56 (0.37,0.75)        | 0.64 (0.50,0.77)    | 0.62 (0.43,0.8)         |
| IL-10                                    | Day 4      | 0.62 (0.45,0.79)        | 0.51 (0.31,0.72)        | 0.60 (0.46,0.73)    | 0.57 (0.43,0.71)        |
| IL-8/CXCL8                               | Day 4      | 0.60 (0.45,0.75)        | 0.64 (0.49,0.79)        | 0.46 (0.33,0.60)    | 0.68 (0.54,0.83)        |

747 **Scores in bold are values equal to or greater than 0.74**

748 TE, total expression

749 SFU, number of spot forming units

750 SS, spot size

751

752 **Table 4. Evidence of Immunosuppression in SEPSIS Patients with Reduced Stimulated**  
 753 **IFN $\gamma$  Total Expression (TE) As Discriminated by ELISpot at Days 1 and 4 Post-ICU**  
 754 **Admission.** The threshold for reduced TE was set at 80% sensitivity. On day 1 the specificity  
 755 was 42.1% and on day 4 the specificity was 63.2%.

756

| <b>Day 1</b>                                                  | <b>ELISpot IFN<math>\gamma</math> TE<br/>&lt;2334/<math>\mu\text{m}^2</math><br/>N=65</b> | <b>ELISpot IFN<math>\gamma</math> TE <math>\geq</math>2334 (<math>\mu\text{m}^2</math>)<br/>N=40</b> | <b>P-value</b>      |
|---------------------------------------------------------------|-------------------------------------------------------------------------------------------|------------------------------------------------------------------------------------------------------|---------------------|
| Age                                                           | 64.2 (14.7)                                                                               | 54.6 (15.1)                                                                                          | 0.002               |
| Total WBC cell<br>day 1 (x 10 <sup>3</sup> /ml)               | 13.9 (7.07)                                                                               | 15.7 (7.77)                                                                                          | 0.158               |
| Absolute<br>Lymphocyte<br>Count Day 1<br>(/ $\mu\text{l}^3$ ) | 980 (249)                                                                                 | 1460 (600)                                                                                           | 0.028               |
| sPD-L1 day 1<br>(pg/ml)                                       | 315 (333)                                                                                 | 263 (246)                                                                                            | 0.311               |
| IL-10, day 1<br>(pg/ml)                                       | 32.3 (70.0)                                                                               | 28.6 (37.7)                                                                                          | 0.608               |
| <b>Outcome</b>                                                |                                                                                           |                                                                                                      | <b>Odds-ratio</b>   |
| 180-day<br>mortality                                          | 23.1%                                                                                     | 7.5%                                                                                                 | 3.70<br>(1.00,13.7) |
| In-Hospital<br>mortality                                      | 18.5%                                                                                     | 5.0%                                                                                                 | 4.30<br>(0.91,20.3) |
| CCI                                                           | 18.5%                                                                                     | 7.5%                                                                                                 | 2.79<br>(0.74,10.6) |
| Second<br>Infection                                           | 59.6% (6<br>missing)                                                                      | 58.8% (13 missing)                                                                                   | 1.03<br>(0.43,2.49) |

757

758

| <b>Day 4</b> | <b>ELISpot IFN<math>\gamma</math> TE<br/>&lt;1755/<math>\mu\text{m}^2</math> N=41</b> | <b>ELISpot IFN<math>\gamma</math> TE<br/><math>\geq</math>1755 (<math>\mu\text{m}^2</math>) N=51</b> | <b>P-value</b> |
|--------------|---------------------------------------------------------------------------------------|------------------------------------------------------------------------------------------------------|----------------|
| Age          | 66.2(14.0)                                                                            | 58.1(15.7)                                                                                           | 0.011          |

|                                                     |                    |                   |                     |
|-----------------------------------------------------|--------------------|-------------------|---------------------|
| Total WBC cell day 1 (x 10 <sup>3</sup> /ml)        | <b>13.6(6.93)</b>  | <b>15.4(8.18)</b> | 0.305               |
| Absolute Lymphocyte Count Day 1 (/ml <sup>3</sup> ) | 70.7 (197)         | 191 (580)         | <b>0.006</b>        |
| sPD-L1 day 1 (pg/ml)                                | 337(248)           | 239(290)          | <b>0.007</b>        |
| IL-10, day 1 (pg/ml)                                | 42.7(89.9)         | 24.0(27.7)        | 0.086               |
| <b>Outcome</b>                                      |                    |                   | <b>Odds-ratio</b>   |
| 180-day mortality                                   | 29.3%              | 5.9%              | 6.62<br>(1.72,25.5) |
| In-Hospital mortality                               | 19.5%              | 5.9%              | 3.88<br>(0.96,15.7) |
| CCI                                                 | 22.0%              | 7.8%              | 3.30<br>(0.94,11.7) |
| Second Infection                                    | 58.8% (12 missing) | 56.4% (7 missing) | 1.10<br>(0.44,2.80) |

759

760



761 **Table 5. Multivariate Logistic Regression to Discriminate Time to Mortality based on**  
762 **Charlson Comorbidity and SOFA Scores and Day 4 ELISpot Stimulated IFN $\gamma$  Total**  
763 **Expression in SEPSIS Patients.**

764

|                                                                  | Odds ratio       | p value |
|------------------------------------------------------------------|------------------|---------|
| <b>Model I: Standard clinical indices only</b>                   |                  |         |
| <b>SOFA score Day 4</b>                                          | 1.30 (1.12-1.50) | 0.0003  |
| <b>Charlson comorbidity score (CCS) baseline</b>                 | 1.48 (1.24-1.77) | <0.0001 |
| <b>Model II: ELISpot indices only</b>                            |                  |         |
| <b>ELISpot IFN<math>\gamma</math> TE Day 4 (Negative of log)</b> | 1.44 (1.07-1.95) | 0.017   |
| <b>Model III: Standard clinical indices + ELISpot indices</b>    |                  |         |
| <b>SOFA score Day 4</b>                                          | 1.28 (1.11-1.49) | 0.0008  |
| <b>Charlson comorbidity score (CCS) baseline</b>                 | 1.48 (1.22-1.79) | <0.0001 |
| <b>ELISpot IFN<math>\gamma</math> TE Day 4 (Negative of log)</b> | 1.29 (0.90-1.85) | 0.165   |

765

766

767

768 **Supplementary Table 1. Demographics and Outcomes Between SEPSIS Patients who**  
 769 **Survived or Died Within 180 Days after Sepsis.** Values represent the number of sample  
 770 measurements for each analyte.

|                                         | <b>Survivors, n=89</b>  | <b>Non-Survivors, n=18</b> | <b>p value</b>    |
|-----------------------------------------|-------------------------|----------------------------|-------------------|
| <b>Male [n (%)]</b>                     | 53 (60%)                | 9 (50%)                    | 0.454             |
| <b>Age, years</b>                       | 62 (48, 70)             | 66 (59, 80)                | <b>0.0166</b>     |
| <b>BMI, kg/m<sup>2</sup></b>            | 28.0 (22.8, 34.9)       | 25.5 (21.3, 34.6)          | 0.490             |
| <b>SOFA Score</b>                       | 6 (4, 8)                | 10 (5, 11)                 | <b>0.0236</b>     |
| <b>Charlson Comorbidity Score</b>       | 2 (1, 4)                | 6 (4, 7)                   | <b>&lt;0.0001</b> |
| <b>Total Leukocyte Counts</b>           | <b>Survivors, n=82</b>  | <b>Non-Survivors, n=17</b> |                   |
| <b>WBC (x10<sup>3</sup>/μl)</b>         | 12.9 (9.6, 19.0), n=85  | 11.0 (8.1, 17.0), n=18     | 0.371             |
| <b>Monocytes (%)</b>                    | 4.6 (3.1, 7.5), n=84    | 4.7 (2.6, 6.0)             | 0.645             |
| <b>Monocytes (x10<sup>3</sup>/μl)</b>   | 0.7 (0.4, 1.0)          | 0.4 (0.3, 1.0)             | 0.264             |
| <b>Neutrophils (%)</b>                  | 86.1 (81.5, 91.4), n=81 | 85.0 (80.6, 90.9)          | 0.729             |
| <b>Neutrophils (x10<sup>3</sup>/μl)</b> | 11.0 (8.0, 17.0)        | 8.8 (6.8, 13.4)            | 0.158             |
| <b>Lymphocytes (%)</b>                  | 6.5 (4.3, 9.4), n=84    | 5.9 (5.3, 8.5)             | 0.980             |
| <b>Lymphocytes (x10<sup>3</sup>/μl)</b> | 0.8 (0.5, 1.2), n=84    | 0.7 (0.5, 1.3)             | 0.684             |
| <b>Plasma Proteins</b>                  | <b>Survivors, n=86</b>  | <b>Non-Survivors, n=18</b> |                   |
| IL-10 (pg/ml)                           | 19.7 (14.8, 26.3)       | 21.2 (16.3, 29.1)          | 0.578             |
| IL-6 (pg/ml)                            | 48.9 (20.0, 187.9)      | 60.3 (25.9, 149.2)         | 0.730             |
| sPD-L1 (pg/ml)                          | 190 (117, 303)          | 275 (181, 403)             | 0.144             |
| Procalcitonin (ng/ml)                   | 993 (254, 3254)         | 1106 (298, 1810)           | 0.487             |
| <b>Clinical Outcomes</b>                | <b>Survivors, n=89</b>  | <b>Non-Survivors, n=18</b> | <b>p value</b>    |

|                                 |                  |                |                    |
|---------------------------------|------------------|----------------|--------------------|
| <b>LOS, days</b>                | 13 (8, 20), n=88 | 14 (7, 20)     | 0.812              |
| <b>ICU LOS, days</b>            | 4 (2, 9)         | 6 (2, 15)      | 0.551              |
| <b>Secondary infection</b>      | 42 (58%), n=73   | 10 (67%), n=15 | 0.512              |
| <b>Favorable discharge</b>      | 59 (66%)         | 2 (11%)        | <b>0.00002</b>     |
| <b>CCI</b>                      | 10 (11%)         | 5 (28%)        | 0.0652             |
| <b>In-Hospital Mortality</b>    | 1 (1%)           | 13 (72%)       | <b>&lt;0.00001</b> |
| <b>30-Day Mortality</b>         | 0                | 12 (70%)       | <b>&lt;0.00001</b> |
| <b>180-Day Mortality</b>        | 0                | 18 (100%)      |                    |
| <b>Disposition at discharge</b> |                  |                |                    |
| <b>Home</b>                     | 26 (29%)         | 1 (6%)         | <b>0.035</b>       |
| <b>LTAC</b>                     | 4 (4%)           | 0              |                    |
| <b>IPR</b>                      | 11 (12%)         | 1 (6%)         | 0.404              |
| <b>Hospital</b>                 | 2 (2%)           | 0              |                    |
| <b>Other</b>                    | 2 (2%)           | 0              |                    |
| <b>SNF</b>                      | 19 (21%)         | 2 (11%)        | 0.319              |
| <b>Residential facility</b>     | 0                | 0              |                    |
| <b>Home with services</b>       | 21 (24%)         | 0              |                    |
| <b>AMA</b>                      | 1 (1%)           | 0              |                    |
| <b>Death</b>                    | 1 (1%)           | 13 (72%)       | <b>&lt;0.00001</b> |
| <b>Hospice facility</b>         | 2 (2%)           | 0              |                    |
| <b>Home with hospice</b>        | 0                | 1 (6%)         |                    |

771

772

773 **Figure 1. Flow Diagram for Study Enrollment**

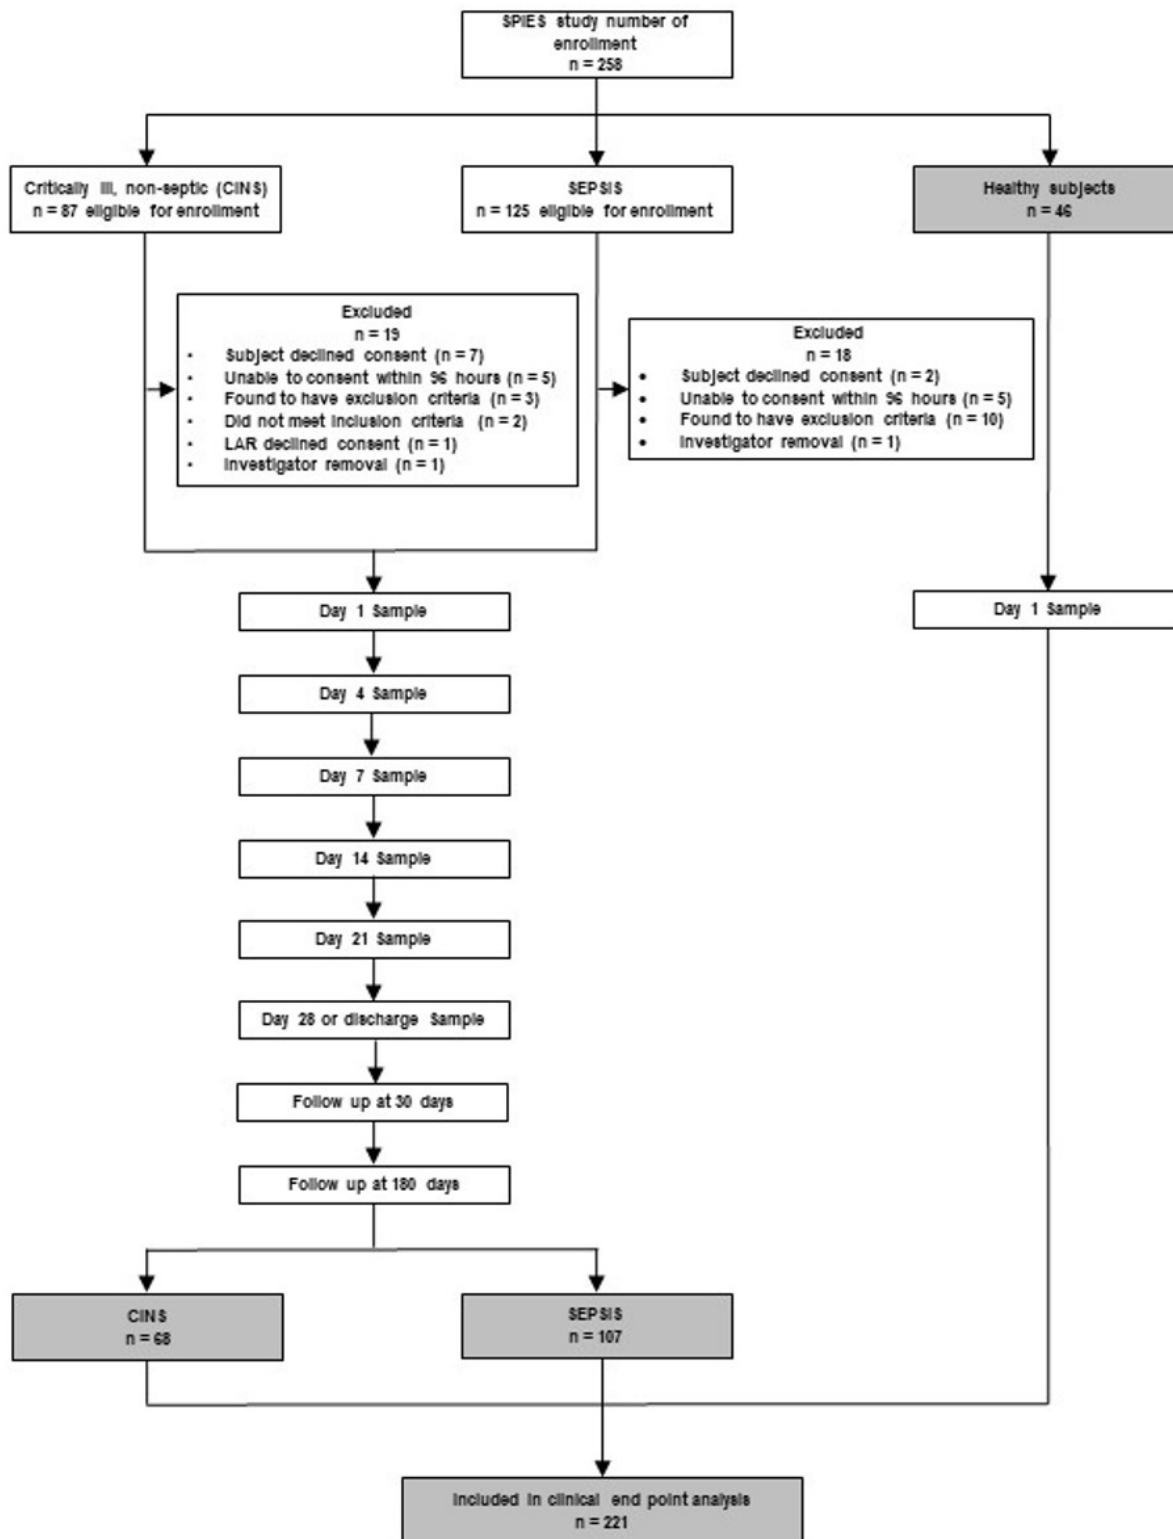

776 **Figure 2. Unstimulated and Stimulated IFN $\gamma$  Expression as Determined by ELISpot in**  
777 **SEPSIS and CINS Patients, and Healthy Control Subjects on Days 1, 4, and 7 Following**  
778 **ICU Admission.** Values represent medians and individual subject responses. Panels A, B, C  
779 are from unstimulated whole blood while Panels D, E, F are antiCd3/CD28 stimulated whole  
780 blood. Note that the scales for unstimulated expression are logarithmic, whereas they are  
781 linear for stimulated expression to appropriately reflect the magnitude and heterogeneity of the  
782 individual response. \* p< 0.05, \*\* p<0.01, \*\*\*p<0.001, \*\*\*\*p<0.0001 as determined by Kruskal-  
783 Wallace ANOVA and post-hoc analyses using the Dunn test. Values are two sided and  
784 represent raw p values. SFU, spot forming units. SS, spot size. TE, total IFN $\gamma$  expression.

### ***Unstimulated ELISpot Total IFN $\gamma$ Expression (TE)***

#### ***A. Day 1***

#### ***B. Day 4***

#### ***C. Day 7***

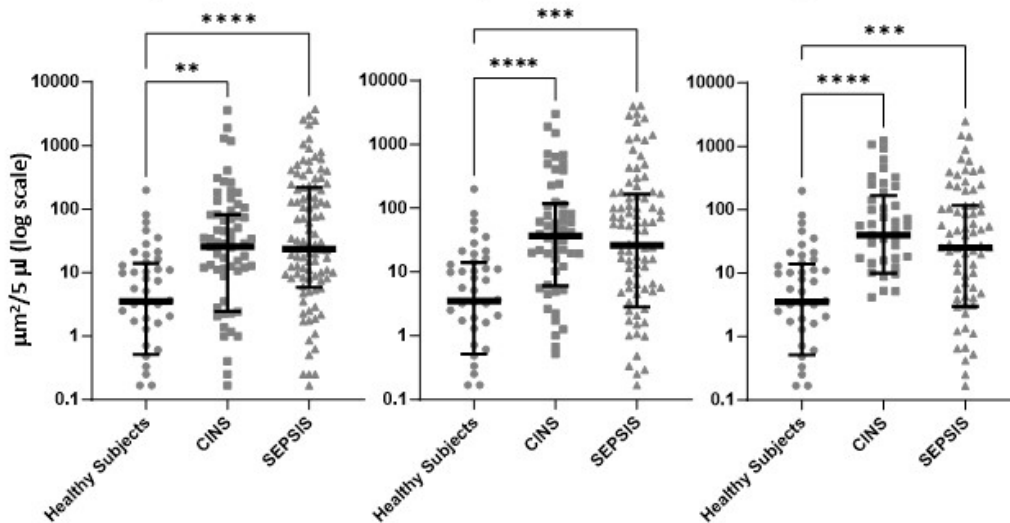

### ***Stimulated ELISpot Total IFN $\gamma$ Expression (TE)***

#### ***D. Day 1***

#### ***E. Day 4***

#### ***F. Day 7***

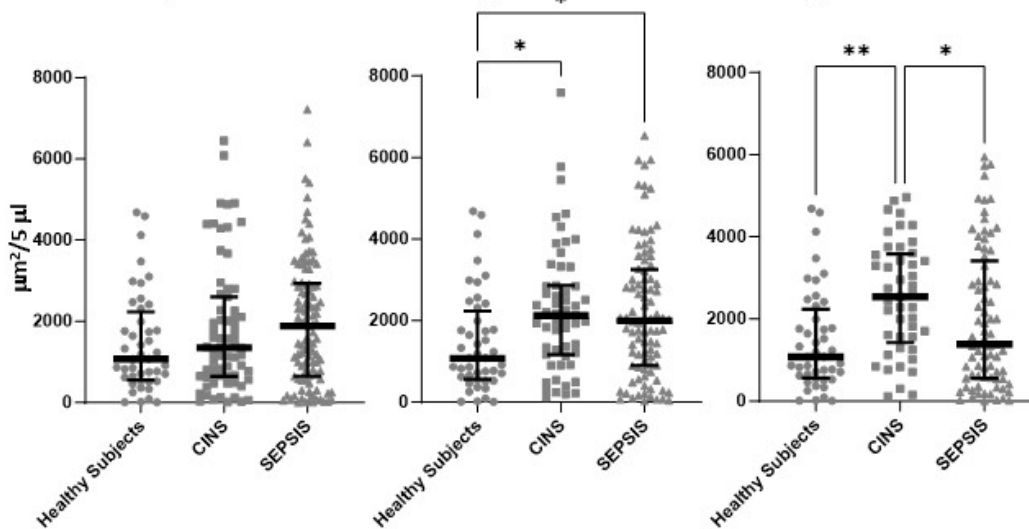

785

786

787 **Figure 3 – ELISpot Spot Forming Units (SFU) (Panels A, B, C) and Spot Size (SS) (Panels**  
788 **D, E, F) from Unstimulated Whole Blood in the Three Cohorts (Healthy Subjects, SEPSIS**  
789 **and CINS).** In unstimulated whole blood, SEPSIS and CINS cohorts demonstrated a  
790 consistent increase in the number of cells (SFU) producing IFN $\gamma$ , when compared to healthy  
791 subjects. \*  $p < 0.05$ , \*\*\*  $p < 0.001$ , \*\*\*\*  $p < 0.0001$ , as determined by Kruskal-Wallis ANOVA and  
792 post-hoc analyses using the Dunn test. Values are two sided and represent raw  $p$  values.  
793 SFU, spot forming units. SS, spot size. TE, total IFN $\gamma$  expression.

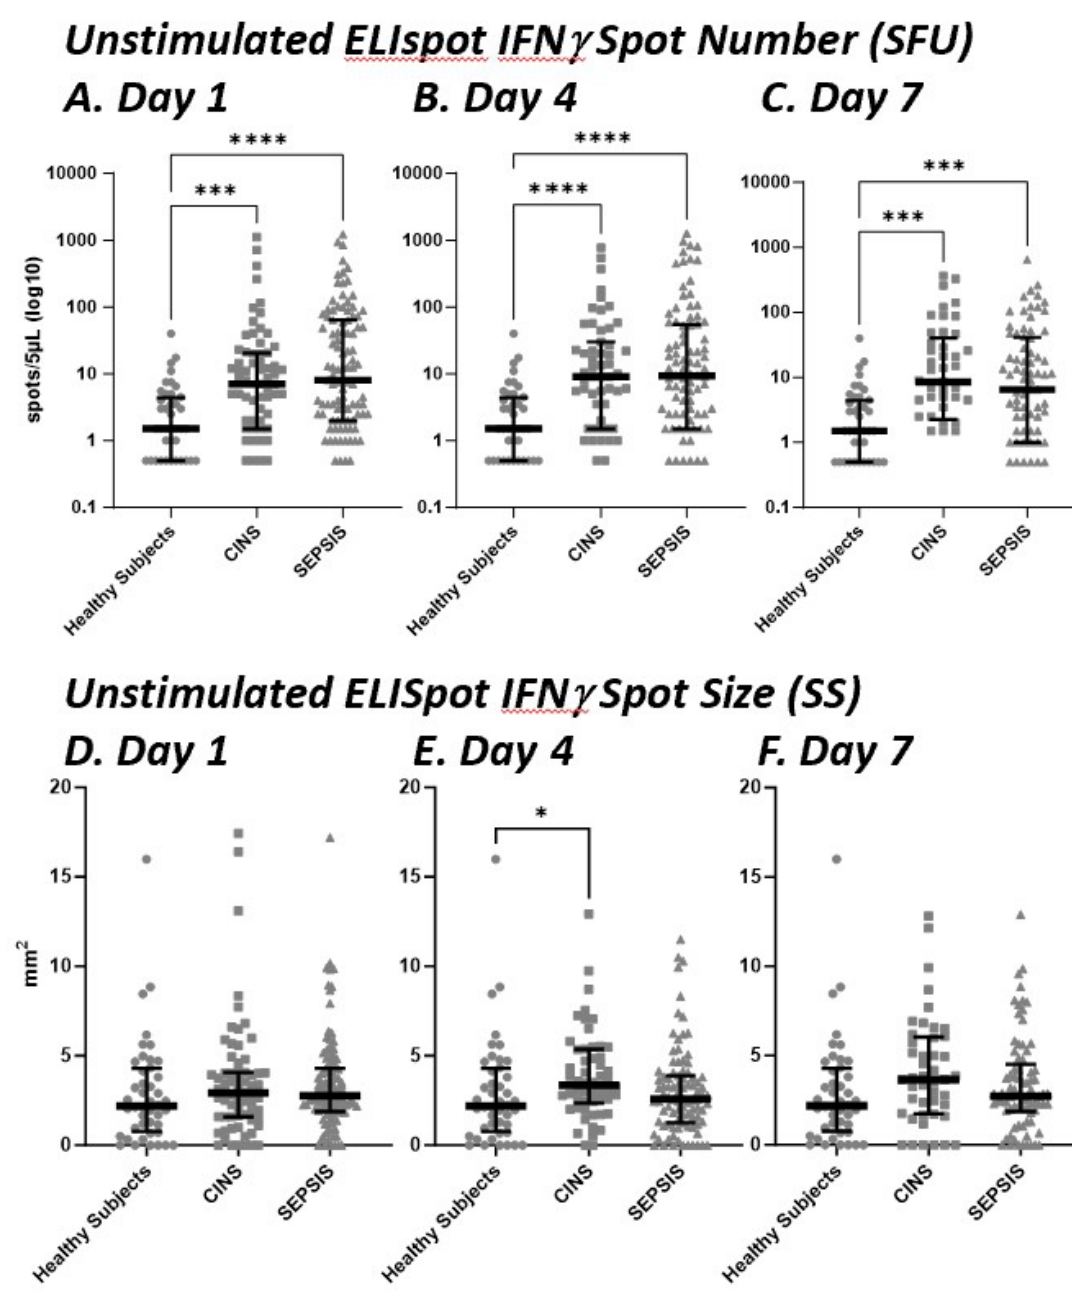

794

795

796

797 **Figure 4. Anti-CD3/CD28 Stimulated IFN $\gamma$  Expression by ELISpot in Sepsis Patients**  
798 **Measured at 1, 4 and 7 Days after ICU Admission who Survived or Did Not Survive by**  
799 **180 days.** Panels A, B, C reflect spot number, D, E, F, spot size, and G, H, I, total IFN $\gamma$   
800 expression. Values represent medians and individual subject responses. The number of  
801 subjects declines over time as patients are either discharged from ICU or die. \*  $p < 0.05$ , \*\*  
802  $p < 0.01$ , \*\*\* $p < 0.001$ , \*\*\*\* $p < 0.0001$  as determined by Kruskal-Wallis ANOVA and post-hoc  
803 analyses using the Dunn test. Values are two sided and represent raw  $p$  values. SFU, spot  
804 forming units. SS, spot size. TE, total IFN $\gamma$  expression.

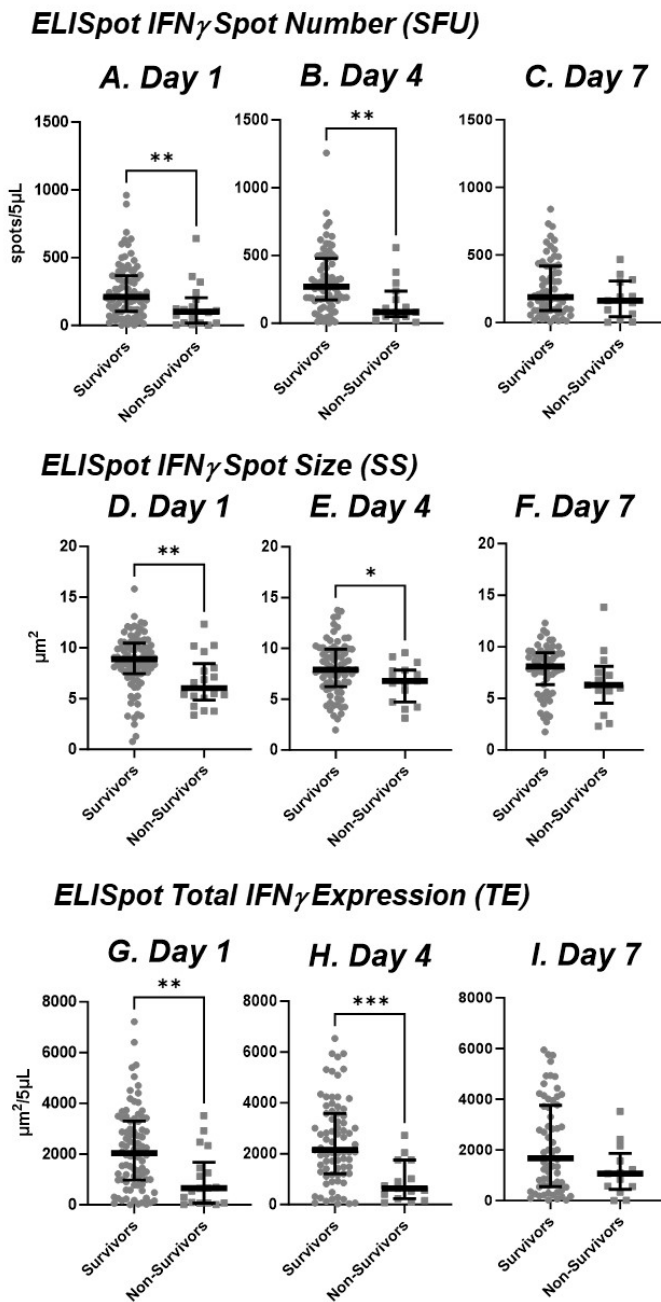

806 **Figure 5. Area under the Receiver Operator Curves (AUROC) for Physiologic (SOFA,**  
807 **Charlson comorbidity scores) and Stimulated IFN $\gamma$  ELISpot Responses in Differentiating**  
808 **In-Hospital and 180-day Mortality.** Top Row: Panel A provides SOFA and Charlson  
809 Comorbidity Index, and Panel B, selected ELISpot parameters discriminating 180 day  
810 mortality. Lower Row: Same breakdowns as for the top row discriminating in-hospital  
811 mortality. TE, IFN $\gamma$  ELISpot total expression; SFU, IFN $\gamma$  ELISpot spot forming units; SS  
812 IFN $\gamma$  ELISpot spot size

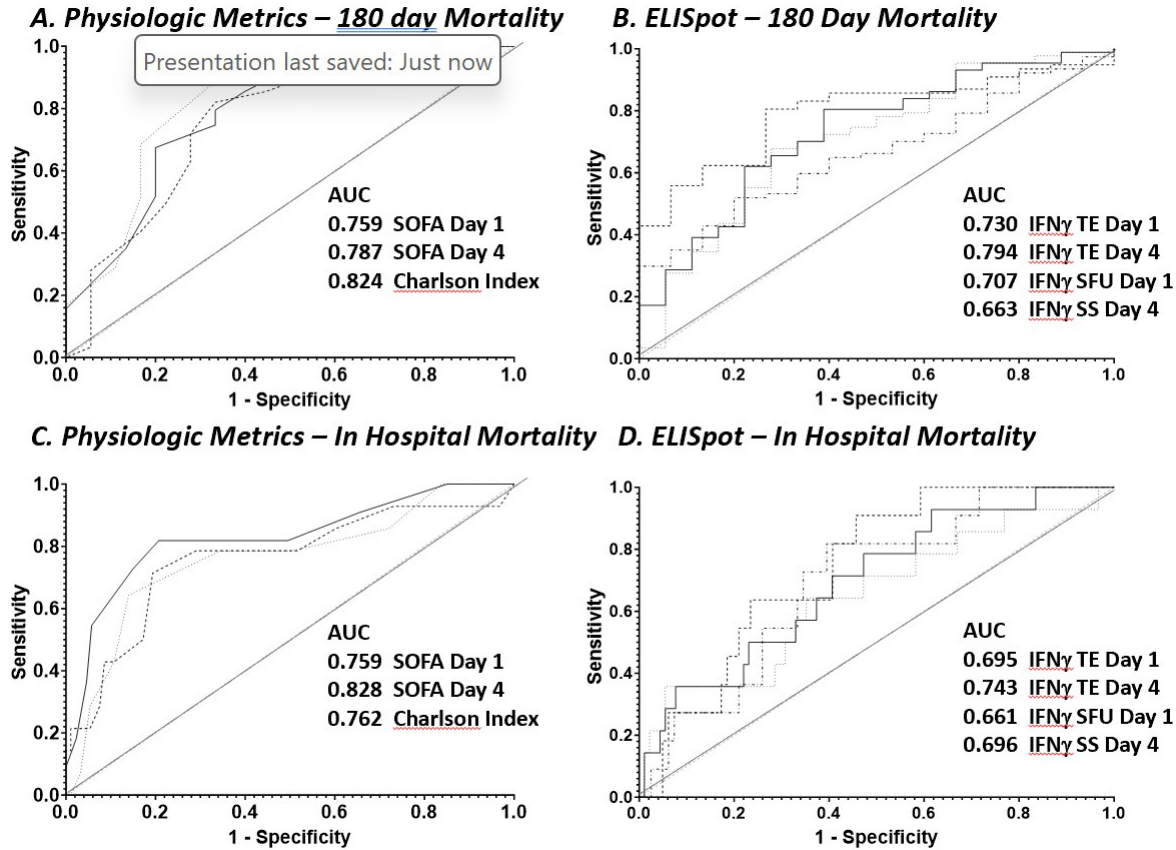

813

814



815 **Supplemental Figure 1. Absolute Lymphocyte Counts in SEPSIS and CINS Cohorts at**  
816 **Different Time Intervals and Healthy Subjects.** Whole blood was collected at different time  
817 points and total and absolute lymphocyte counts were determined. Both SEPSIS and CINS  
818 resulted in a significant decline in total lymphocytes when compared to healthy subjects on  
819 days 1, 4 and 7, while absolute lymphocyte counts were lower in SEPSIS than in CINS  
820 patients on day 1. Healthy control subjects were sampled only once but values are presented  
821 at each time point for comparison. \*  $p < 0.05$ , \*\*\*  $p < 0.001$ , \*\*\*\*  $p < 0.0001$  as determined by  
822 Kruskal-Wallis ANOVA and post-hoc analyses using the Dunn test. Values are two sided  
823 and represent raw  $p$  values.

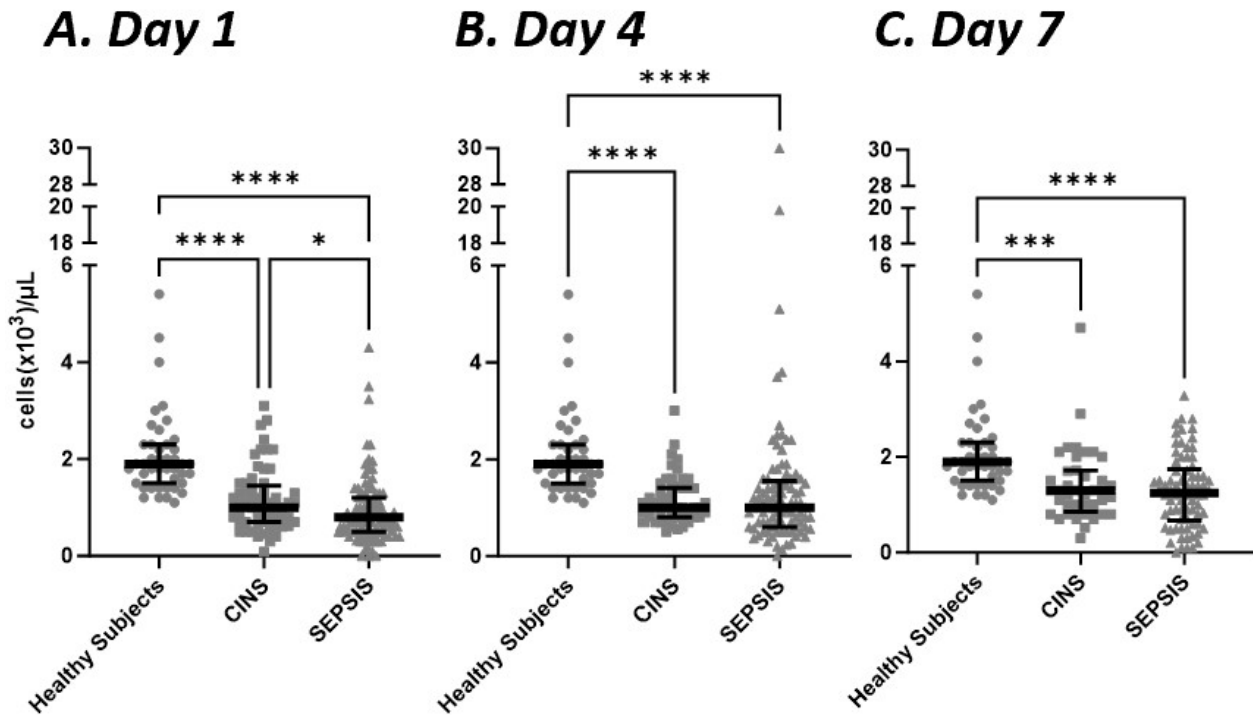

824  
825

826

827 **Supplemental Figure 2. Percentage of Lymphocytes Expressing IFN $\gamma$  in Whole Blood**  
828 **from SEPSIS and CINS cohorts, and Healthy Subjects.** The number of spot forming units  
829 was compared to the absolute lymphocyte count and the percentage of lymphocytes producing  
830 IFN $\gamma$  was calculated. Regardless of time after enrollment, both SEPSIS and CINS markedly  
831 increased the percentage of IFN $\gamma$ -producing cells. \*  $p < 0.05$ , \*\*\*  $p < 0.001$ , \*\*\*\*  $p < 0.0001$ , as  
832 determined by Kruskal-Wallis ANOVA and post-hoc analyses using the Dunn test. Values  
833 are two sided and represent raw  $p$  values. SFU, spot forming units. SS, spot size. TE, total  
834 IFN $\gamma$  expression.  
835

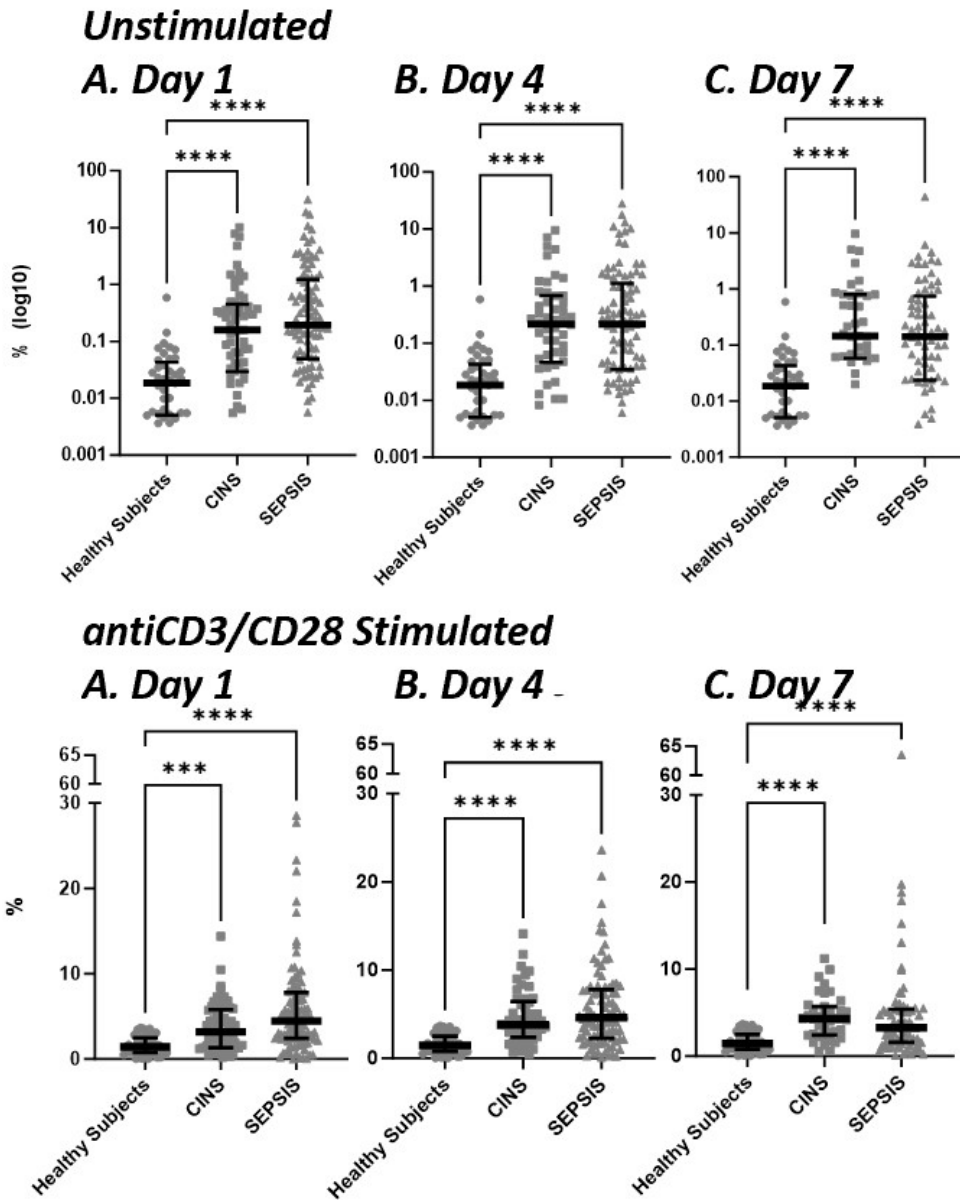

## Supplemental Methods

837  
838  
839 Detailed specific criteria for consenting and enrolling SEPSIS and CINS patients, and healthy  
840 control subjects are described below, as is sampling and processing procedures. Actual IRB  
841 documentation and the Consortium Laboratory Manual are readily available by simply  
842 requesting them from our data and sample broker, the UF Clinical and Translational Research  
843 Institute Biorepository ([https://www.ctsi.ufl.edu/research/laboratory-services/ctsi-biorepository-  
844 2/scirc-specimens-archive/](https://www.ctsi.ufl.edu/research/laboratory-services/ctsi-biorepository-2/scirc-specimens-archive/)).

### 845 Recruitment methods

846 Screening for sepsis will be carried out using each hospital's own version of their sepsis alert  
847 system, which quantifies derangements in vital signs, white blood cell count, and mental  
848 status. After a putative diagnosis of sepsis, the patient is transferred to the ICU and sepsis  
849 treatment bundles are initiated. If a patient is believed to have an infection and they are located  
850 in, or transferred to the ICU, they are entered into each institution's sepsis management  
851 protocol as standard of care which implements a variety of standard operating procedures  
852 (SOPs) of clinical ICU care. After the patient enters the clinical management protocol, the  
853 research coordinator is notified of a potential research subject. This coordinator will then  
854 assess the following inclusion/exclusion criteria and consent the appropriate candidates.

855 All critically ill patients with or without sepsis will be managed via each institution's evidence-  
856 based management protocols that emphasize early antibiotic administration, fluid resuscitation  
857 and hemodynamic monitoring and support, consistent with current Surviving Sepsis Campaign  
858 guidelines.

### 859 Consenting

860 Consent will be sought by clinical research staff, all of whom are familiar with institutional  
861 logistics and infrastructure, sample acquisition and preparation, and are experienced in the  
862 nuances of enrollment and informed consent for this challenging patient population. Many  
863 critically ill patients in the ICUs may have altered mental status or pharmacologic sedation, but  
864 would be regarded as prospective research subjects. We will seek an IRB-approved 96-hour  
865 delayed consent for blood sample acquisition and completion of the /T1 visit per protocol  
866 (within the first 72 hours). This includes: study criteria evaluation, sample collection and  
867 transportation to clinical and research laboratories, collection of demographic information, and  
868 collection of medical laboratory results to compliment research experiments. Additionally, we  
869 will seek approval for telephone consent in the event that no LAR is physically present. For the  
870 ICU patient population, many of whom are pharmacologically sedated and mechanically  
871 ventilated, initial consent is commonly requested from LAR/next of kin. The setting for  
872 conveying consent information to LAR/next of kin is often the ICU family waiting area or at  
873 bedside. Consideration is given to the emotional status of the LAR/next of kin and ability to  
874 understand the basic intent, methods, and voluntary nature of participation. If we need to call a  
875 LAR, ideally we will email them a copy of the consent and review, record approval with a  
876 witness on the line. If we can't email them, then we will review the entire consent over the  
877 phone, record approval with a witness on the line.

878 The research staff will monitor the patient's progress and once they regain capacity, the patient  
879 will be re-consented. If patient does not regain capacity to consent by discharge, he/she will be  
880 consented at their next follow-up visit if capacity is regained.

881 For the healthy control subjects, we will send an email out to the Department of Surgery email  
882 distribution list to all department staff for recruiting healthy control participants. When the  
883 participant comes in for the blood draw we will review the consent and have them sign.

## 884 **Specific Inclusion/Exclusion Criteria**

### 885 **SEPSIS- Presumed Sepsis Patients**

#### 886 Inclusion Criteria

887 A. Directly admitted ICU patients with sepsis (From ED or OR)  
888 ICU patient developing sepsis during hospitalization.  
889 Transferred to ICU from inpatient unit for development of sepsis.  
890 Documentation in notes or diagnoses of "Sepsis", "Septic shock", "Severe Sepsis"

891 or

892 B. Suspicion of infectious cause of illness on admission  
893 Documentation of suspected infection  
894 Infectious testing performed (blood, urine, other cultures, viral or fungal testing)  
895 Diagnostic testing: chest X-ray. CT scan of abdomen  
896 Initiation of antimicrobial therapy (antibiotics, antivirals, antifungals)  
897 Source control operation/procedure performed

898 and

899 Organ dysfunction as defined as an acute change in total SOFA score of 2 points  
900 consequent to the infection.

901 The baseline SOFA score can be assumed to be zero in patients not known to have  
902 preexisting organ dysfunction.

903

#### 904 Exclusion Criteria

905 Patients deemed to be futile care or have advanced care directives or goals of care  
906 limiting resuscitative efforts.

907 Severe traumatic brain injury (evidence of neurologic injury on CT scan and a GCS <8  
908 after resuscitation).

909 Refractory shock (i.e., patients who are expected to die within 24hours).

910 Uncontrollable source of sepsis (e.g. irreversible disease state such as unresectable  
911 dead bowel).

912 Outside facility transfer where suspected sepsis onset is >72 hours prior to ICU  
913 admission.

914 Active chronic hepatitis or other chronic infectious diseases.

915 Known HIV infection with CD4 count <200 cells/mm<sup>3</sup>.

916 Organ transplant recipient on immunosuppressive agents.

917 Known pregnancy.

918 Prisoners.

919 Institutionalized patients.  
920 Active cancer.  
921 Any recent (past 6 months) chemotherapy or immunomodulatory therapies (including  
922 biologics, monoclonal antibodies).  
923 Patient having received steroids in past 4 weeks.  
924

## 925 **CINS – Critically-ill non-sepsis patients**

### 926 Inclusion Criteria

927  
928 A. Patients admitted to the SICU for non-infectious reasons  
929 Trauma patients  
930 Post-operative patients (not infectious source control procedures)  
931 Inpatients transferred to the SICU for non-infectious reasons (e.g., bleeding, volume  
932 overload, acute cardiac issue, ect.)  
933

### 934 Exclusion criteria

935  
936 Patients deemed to be futile care or have advanced care directives or goals of care  
937 limiting resuscitative efforts.  
938 Severe traumatic brain injury (evidence of neurologic injury on CT scan and a GCS <8 after  
939 resuscitation).  
940 Refractory shock (i.e., patients who are expected to die within 24hours).  
941 Uncontrollable source of sepsis (e.g. irreversible disease state such as unresectable dead  
942 bowel).  
943 Outside facility transfer where suspected sepsis onset is >72 hours prior to ICU admission.  
944 Active chronic Hepatitis or other chronic infectious diseases.  
945 Known HIV infection with CD4 count <200 cells/mm<sup>3</sup>.  
946 Organ transplant recipient on immunosuppressive agents.  
947 Known pregnancy.  
948 Prisoners.  
949 Institutionalized patients.  
950 Active cancer.  
951 Any recent (past 6 months) chemotherapy or immunomodulatory therapies (including  
952 biologics, monoclonal antibodies).  
953 Patient having received steroids in past 4 weeks.  
954

## 955 **Healthy Control Subjects**

### 956 Inclusion Criteria

957  
958  
959 All adults (age >=18)  
960 Ability to obtain Informed Consent prior to blood collection.  
961

### 962 Exclusion Criteria

- 963
- 964 Current, chronic steroid use
- 965 Pregnancy
- 966 Current or recent (within 7 days) use of antibiotics.
- 967

968 **Sample Collection**

969

970 **The overview of research sample collection for SPIES clinical study are presented in**

971 **the Sample Collection Chart:**

972

| SPIES Sample Collection Chart                                                       |            |            |            |            |            |                     |
|-------------------------------------------------------------------------------------|------------|------------|------------|------------|------------|---------------------|
|                                                                                     | T1         | T2         | T3         | T4         | T5         | T6                  |
|                                                                                     | Day 1      | Day 4      | Day 7      | Day 14     | Day 21     | Day 28 or discharge |
|                                                                                     |            | (+/- 1)    | (+/- 1)    | (+/- 2)    | (+/- 2)    | (+/- 2)             |
| Whole Blood ELISpot (1ml), HLA-DR (1ml), Cytokines (4-8ml) - 6-10ml heparin (green) | X          | X          | X          | X          | X          | X                   |
| (Optional) CBC w/diff - 2ml EDTA (purple)                                           | X          | X          | X          | X          | X          | X                   |
| Gene Expression - 2.5ml PAXgene                                                     | X          | X          | X          | X          | X          | X                   |
| Total blood (ml)                                                                    | 8.5 - 14.5 | 8.5 - 14.5 | 8.5 - 14.5 | 8.5 - 14.5 | 8.5 - 14.5 | 8.5 - 14.5          |

- 973
- 974

975 **PLASMA PROCESSING**

976 Administrative Note: All personnel involved in the procedures are to have completed the

977 University required Blood-Borne Pathogen training program, and provided suitable personal

978 protection equipment (PPE). These procedures are to be performed whenever possible in a

979 biocontainment hood (BSL1 or BSL2). All solid or liquid waste derived from the blood must be

980 disposed of appropriately in a biohazard container or inactivated using bleach or an acceptable

981 disinfectant. Venous or arterial whole blood is collected into the appropriate blood collection

982 tubes for each time point. The collection of blood should be obtained from an existing arterial

983 or venous line, or venipuncture should be performed by someone experienced in the

984 technique, and familiar with infectious precautions. The blood should be processed as soon as  
985 possible, **but within 3 hours of the draw**. The blood should be **kept cold on ice** during the  
986 period from the draw to the initiation of processing.

### 987 **CBC with Differential**

988 Each site must collect for and obtain a CBC with Differential at every patient sample time  
989 point. These must be collected at the same time as the study blood draws or as close to it as  
990 possible if done through the hospital's standard of care. This data must be entered into  
991 REDCap.

### 992 **Plasma Collection**

993 1. Invert the green heparin blood tube gently to thoroughly mix the blood. Transfer one ml  
994 of blood to a 15 ml conical (polyethylene or polystyrene) tube labeled HLA-DR. And transfer  
995 500 ul of blood to a 1.5 ml microcentrifuge tube labeled ELISpot.

996

997 2. After removing the blood needed for the ELISpot and Smart Tube assays in Step 1,  
998 centrifuge the remaining blood in the green top heparin blood collection tube at room  
999 temperature (22°C) for 10 minutes at 1,800 x g, with the brake on low.

1000

1001 3. Once the tube has finished spinning, carefully transfer the plasma from the green top  
1002 blood tube (take care not to disturb the cellular constituents) and aliquot 500 ul of plasma  
1003 equally into 4-6 **green** capped plasma collection tubes. If there is any remaining plasma,  
1004 collect and distribute evenly among all tubes.

1005



1006        4. Make sure the appropriate *Heparin Plasma* barcode labels are attached to the tubes  
1007 and immediately store at -80°C.  
1008
